# Supplementary material for: Ice-nucleating particles in precipitation samples from the Texas Panhandle
Source: Copernicus journal article supplement (doi:10.5194/acp-21-4503-2021), 2021-03-24
Supplement: Supplementary file 1 [file supplement.pdf › supplement.pdf]

5

Supplemental Information

10

15

S1. Precipitation and Particulate Matter Properties

S1.1 Precipitation Categorization

20

In this study, we have segregated our precipitation samples into four different categories, such as (1) snow, (2) hails/thunderstorm, (3) long-lasting rain, and (4) weak rain, based on our disdrometer observation of precipitation. For this categorization, we have considered both our visual observation and the disdrometer-assigned National Weather Service (NWS) code. Initially, the precipitation samples had been assigned one of the four categories based on our visual observation. Next, we used each NWS code and its occurrence in each precipitation sample to finalize the precipitation category. For example, a precipitation sample was categorized into snow only when we identified a snow type NWS code (Snow: S-, S, S+ and/or Snow Grains: SG). Likewise, a precipitation sample was categorized into hail/thunderstorm when the cumulative sum of NWS codes for hail was counted more than five times (i.e.,  $A + SP \geq 5$ ; where A and SP are the codes for soft hail and hail, respectively). This limit of five was chosen arbitrarily. If there existed no snow and/or hail type NWS codes, we defined the category as we observed, thus falling in either long-lasting or weak rain category. Overall, we acquired 6 snow, 18 hail/thunderstorm, 13 long-lasting rain, and 5 weak rain samples for the sampling period of June 2018 – July 2019.

25

30

**Table S1** gives the detailed information about the collected precipitation samples. The ID# column goes from 1-42. The column of 'Sample#' is the precipitation sample number in the chronological order. The missing precipitation sample numbers are the ones which collected a negligible amount of precipitation (typically < 1 ml). This amount is too small to carry out the West Texas Cryogenic Refrigerator Applied to Freezing Test (WT-CRAFT) ice-nucleating particle (INP) measurements. The amount of precipitation collected (in ml) is presented in **Table S1**. This table also includes the meteorological season in which each precipitation was observed and collected.

35

S1.2 Disdrometer and IoT Measurements

40

We have measured the ambient meteorological properties, particulate matter (PM) concentrations and precipitation properties including the intensity and number of precipitation particles using OTT Parsivel<sup>2</sup> Laser disdrometer and Internet of Things (IoT) PM sensors. The average temperature (T), relative humidity, PM concentrations, and intensity measured during each precipitation event are shown in **Table**

45

**S2.** The overall average values calculated for the entire sampling period (i.e., June 2018 – July 2019) for *T* and relative humidity are 17.7 ± 15 °C and 46.5 ± 12.3 %, respectively. The maximum and minimum intensities observed during each precipitation sampling are also shown in **Table S2**. The cumulative number of detected particles is the total number of precipitation particles measured by a disdrometer in each precipitation sample. **Table S3** shows the average, maximum and minimum intensity (mm hr<sup>-1</sup>), number of detected particles, and mode and maximum hydrometeor size in diameter (mm) for each precipitation category.

50

**Table S1.** Summary of the Precipitation Categories and sampling periods.

| ID# | Sample#     | Start Date<br>(Local Time) | End Date<br>(Local Time) | Season | Volume<br>Collected (ml) | NWS Code*                           | Precipitation Type |
|-----|-------------|----------------------------|--------------------------|--------|--------------------------|-------------------------------------|--------------------|
| 1   | PCPT_NSB_1  | 6/12/2018 0:30             | 6/13/2018 9:30           | Summer | 13                       | C, R-, SP, R, R+, A                 | Hail/Thunderstorm  |
| 2   | PCPT_NSB_2  | 6/13/2018 10:42            | 6/17/2018 13:50          |        | 15                       | C, R, R-, R+, A, SP, RL-            | Hail/Thunderstorm  |
| 3   | PCPT_NSB_5  | 6/30/2018 12:35            | 7/3/2018 9:35            |        | 3                        | C, R-, R, R+, A, RL-, L-            | Long-Lasted Rain   |
| 4   | PCPT_NSB_6  | 7/3/2018 9:40              | 7/6/2018 19:40           |        | 3                        | C, R-, R, A, R+, RL-                | Long-Lasted Rain   |
| 5   | PCPT_NSB_7  | 7/13/2018 16:40            | 7/14/2018 8:05           |        | 5.1                      | C, R, R+, A, R-, RL-, SP            | Hail/Thunderstorm  |
| 6   | PCPT_NSB_8  | 7/14/2018 8:10             | 7/16/2018 13:20          |        | 20                       | C, R, R-, R+, A, RL-                | Hail/Thunderstorm  |
| 7   | PCPT_NSB_9  | 7/16/2018 13:30            | 7/17/2018 18:25          |        | 3.5                      | C, R-, R, R+, A, SP, RL-            | Long-Lasted Rain   |
| 8   | PCPT_NSB_10 | 7/25/2018 0:30             | 7/26/2018 10:50          |        | 5                        | C, R-, R, R+, RL-                   | Long-Lasted Rain   |
| 9   | PCPT_NSB_11 | 7/26/2018 11:00            | 7/30/2018 5:09           |        | 1                        | C, R-, R, R+, RL-                   | Weak Rain          |
| 10  | PCPT_NSB_15 | 8/14/2018 8:20             | 8/16/2018 18:40          |        | 5                        | C, R-, R, R+, A, SP                 | Hail/Thunderstorm  |
| 11  | PCPT_NSB_16 | 8/16/2018 18:50            | 8/17/2018 8:20           |        | 10                       | C, R-, R, R+, A, RL-                | Hail/Thunderstorm  |
| 12  | PCPT_NSB_17 | 8/17/2018 8:30             | 8/20/2018 8:00           |        | 15                       | C, R-, R, R+, RL+, RL-, L-, A       | Long-Lasted Rain   |
| 13  | PCPT_NSB_19 | 9/2/2018 12:00             | 9/5/2018 12:00           | Fall   | 1                        | C, R-, RL-, R                       | Weak Rain          |
| 14  | PCPT_NSB_20 | 9/10/2018 8:10             | 9/21/2018 12:30          |        | 4                        | C, R-, R, SP, RL-                   | Long-Lasted Rain   |
| 15  | PCPT_NSB_23 | 10/5/2018 0:30             | 10/6/2018 10:00          |        | 8                        | C, SP, A, R+, R, R-, RL-, L-        | Hail/Thunderstorm  |
| 16  | PCPT_NSB_24 | 10/6/2018 10:10            | 10/14/2018 10:30         |        | 34                       | C, R-, R, R+, RL-, L-, A, SP, L+    | Hail/Thunderstorm  |
| 17  | PCPT_NSB_25 | 10/14/2018 10:35           | 10/21/2018 13:30         |        | 8                        | C, RL-, S-, S, SP, L-, R, R+, RL+   | Snow Sample        |
| 18  | PCPT_NSB_26 | 10/21/2018 13:35           | 10/28/2018 16:45         |        | 2.5                      | C, R-, RL-, R, R+, SP, L-           | Long-Lasted Rain   |
| 19  | PCPT_NSB_27 | 11/5/2018 8:00             | 11/21/2018 13:55         |        | 7                        | C, RL-, R-, L-, SP, S-, S+, S       | Snow Sample        |
| 20  | PCPT_NSB_29 | 12/14/2018 15:26           | 12/26/2018 12:40         | Winter | 3.5                      | C, RL-, L-, R-, R, R+, SP           | Long-Lasted Rain   |
| 21  | PCPT_NSB_30 | 12/26/2018 12:50           | 12/27/2018 21:50         |        | 3.5                      | C, R-, RL-, L-, SP, RLS-, S-, S+, S | Snow Sample        |
| 22  | PCPT_NSB_31 | 12/27/2018 10:00           | 12/28/2018 13:45         |        | 1.5                      | C, SP, S-, RL-, S, S+, R-           | Snow Sample        |
| 23  | PCPT_NSB_32 | 12/28/2018 13:55           | 12/29/2018 14:08         |        | 1                        | C, S-, SP, L-                       | Snow Sample        |
| 24  | PCPT_NSB_43 | 2/21/2019 18:30            | 2/23/2019 10:45          |        | 2.5                      | C, R-, R, RL-, R+, A, RLS-, L-      | Snow Sample        |
| 25  | PCPT_NSB_46 | 3/11/2019 18:00            | 3/12/2019 9:45           | Spring | 1.5                      | C, RL-, R-, L-, R, R+               | Weak Rain          |
| 26  | PCPT_NSB_47 | 3/12/2019 9:50             | 3/12/2019 18:15          |        | 5                        | C, R-, RL-, R, R+, A, L-            | Weak Rain          |
| 27  | PCPT_NSB_48 | 3/12/2019 18:20            | 3/13/2019 10:00          |        | 12.2                     | C, L-, RL-, R-, R, R+, SP           | Hail/Thunderstorm  |
| 28  | PCPT_NSB_49 | 3/19/2019 18:38            | 3/20/2019 8:50           |        | 5                        | C, R-, RL-, R, A, R+                | Long-Lasted Rain   |
| 29  | PCPT_NSB_51 | 4/17/2019 12:40            | 4/18/2019 10:10          |        | 7.4                      | C, R-, R, SP, R+, RL-               | Hail/Thunderstorm  |
| 30  | PCPT_NSB_52 | 4/22/2019 17:25            | 4/23/2019 10:10          |        | 7.3                      | C, R-, RL-, R, L-, R+               | Long-Lasted Rain   |
| 31  | PCPT_NSB_54 | 4/28/2019 10:30            | 4/30/2019 18:45          |        | 2.1                      | C, RL-, R-, L-, R, SP, A, R+        | Long-Lasted Rain   |
| 32  | PCPT_NSB_55 | 4/30/2019 18:50            | 5/3/2019 14:35           |        | 1.8                      | C, L-, RL-, R-, R, R+               | Weak Rain          |
| 33  | PCPT_NSB_56 | 5/3/2019 14:40             | 5/20/2019 8:40           |        | 6.2                      | C, L-, R-, R, R+, RL-, SP, A, RLS-  | Hail/Thunderstorm  |
| 34  | PCPT_NSB_57 | 5/23/2019 9:00             | 5/26/2019 14:30          |        | 3.4                      | C, R, R-, RL-, A, SP, R+, RL+, L-   | Hail/Thunderstorm  |
| 35  | PCPT_NSB_58 | 5/26/2019 14:20            | 5/27/2019 11:35          |        | 7.4                      | C, R-, R, RL-, R+, A, SP, L-        | Hail/Thunderstorm  |
| 36  | PCPT_NSB_59 | 5/27/2019 11:40            | 6/1/2019 12:30           |        | 7.5                      | C, R-, R, A, R+, RL-, L-            | Long-Lasted Rain   |
| 37  | PCPT_NSB_60 | 6/1/2019 12:35             | 6/2/2019 12:20           | Summer | 17.5                     | C, R-, RL-, R, R+, A, SP, L-        | Hail/Thunderstorm  |
| 38  | PCPT_NSB_61 | 6/2/2019 12:25             | 6/4/2019 11:50           |        | 3                        | C, R-, RL-, R, R+                   | Long-Lasted Rain   |
| 39  | PCPT_NSB_62 | 6/4/2019 12:00             | 6/8/2019 11:40           |        | 3                        | C, R-, RL-, R, R+, SP, L-           | Hail/Thunderstorm  |
| 40  | PCPT_NSB_63 | 6/8/2019 11:50             | 6/14/2019 11:50          |        | 7.2                      | C, RL-, L-, R-, SP, R, R+, A        | Hail/Thunderstorm  |
| 41  | PCPT_NSB_65 | 6/16/2019 12:15            | 6/19/2019 12:45          |        | 5                        | C, R-, SP, RL-, R, L-, R+, A        | Hail/Thunderstorm  |
| 42  | PCPT_NSB_66 | 7/5/2019 19:40             | 7/6/2019 15:30           |        | 25                       | C, R-, R, R+, SP, A, RL-            | Hail/Thunderstorm  |

\*The NWS Code column in the above table shows the assigned precipitation code to each event. The codes are defined as C: no rain; RL, RL+, RL-, L, L+, L-: drizzle; R, R+, R-: rain; A, SP: hail and/or soft hail; and S, S+, S-, RLS: snow and/or snow with rain.

55

**Table S2.** Summary of the precipitation properties and meteorological parameters during the sampling.

| ID# | Sample#     | Precipitation Type | Average T (°C) ± standard dev. | Average RH (%) ± standard dev. | Cumulative No. of detected particles | Average Intensity (mm hr <sup>-1</sup> ) ± standard error | Maximum Intensity (mm hr <sup>-1</sup> ) | Minimum Intensity (mm hr <sup>-1</sup> ) |
|-----|-------------|--------------------|--------------------------------|--------------------------------|--------------------------------------|-----------------------------------------------------------|------------------------------------------|------------------------------------------|
| 17  | PCPT_NSB_25 | Snow               | 8.55 ± 8.62                    | 51.94 ± 11.49                  | 2.49E+05                             | 1.00 ± 0.04                                               | 21.47                                    | 0.01                                     |
| 19  | PCPT_NSB_27 |                    | 4.26 ± 10.33                   | 41.00 ± 3.38                   | 6.58E+05                             | 2.96 ± 0.10                                               | 26.68                                    | 0.01                                     |
| 21  | PCPT_NSB_30 |                    | 2.53 ± 5.92                    | 54.56 ± 10.30                  | 1.68E+05                             | 1.16 ± 0.06                                               | 14.21                                    | 0.02                                     |
| 22  | PCPT_NSB_31 |                    | -3.09 ± 4.83                   | 47.35 ± 5.03                   | 7.25E+04                             | 1.03 ± 0.06                                               | 7.42                                     | 0.14                                     |
| 23  | PCPT_NSB_32 |                    | -6.50 ± 6.70                   | 53.83 ± 6.24                   | 1.07E+04                             | 0.33 ± 0.01                                               | 1.12                                     | 0.01                                     |
| 24  | PCPT_NSB_43 |                    | 2.40 ± 5.23                    | 56.00 ± 8.78                   | 4.16E+04                             | 1.12 ± 0.11                                               | 22.58                                    | 0.05                                     |
| 1   | PCPT_NSB_1  | Hail/Thunderstorm  | 29.76 ± 12.94                  | 46.70 ± 11.90                  | 2.76E+04                             | 11.08 ± 0.94                                              | 67.33                                    | 0.05                                     |
| 2   | PCPT_NSB_2  |                    | 29.61 ± 8.79                   | 46.92 ± 12.37                  | 8.48E+04                             | 5.97 ± 0.57                                               | 83.89                                    | 0.03                                     |
| 5   | PCPT_NSB_7  |                    | 21.57 ± 3.87                   | 58.81 ± 9.28                   | 1.53E+04                             | 3.95 ± 0.49                                               | 40.27                                    | 0.03                                     |
| 6   | PCPT_NSB_8  |                    | 32.41 ± 11.19                  | —                              | 7.7E+04                              | 8.60 ± 0.66                                               | 105.53                                   | 0.04                                     |
| 10  | PCPT_NSB_15 |                    | 31.90 ± 11.60                  | 53.34 ± 12.37                  | 3.33E+04                             | 3.69 ± 0.37                                               | 85.30                                    | 0.04                                     |
| 11  | PCPT_NSB_16 |                    | 25.47 ± 6.30                   | 52.69 ± 5.75                   | 4.75E+04                             | 5.52 ± 0.65                                               | 90.45                                    | 0.03                                     |
| 15  | PCPT_NSB_23 |                    | 21.76 ± 10.88                  | 58.87 ± 10.50                  | 2.9E+04                              | 11.63 ± 1.51                                              | 80.67                                    | 0.02                                     |
| 16  | PCPT_NSB_24 |                    | 11.72 ± 6.31                   | 66.17 ± 7.63                   | 3.49E+05                             | 2.88 ± 0.17                                               | 110.49                                   | 0.01                                     |
| 27  | PCPT_NSB_48 |                    | 7.00 ± 2.91                    | 66.16 ± 9.43                   | 7.63E+04                             | 2.67 ± 0.12                                               | 19.90                                    | 0.01                                     |
| 29  | PCPT_NSB_51 |                    | 12.12 ± 9.11                   | 57.10 ± 10.60                  | 3.83E+04                             | 2.23 ± 0.08                                               | 9.64                                     | 0.04                                     |
| 33  | PCPT_NSB_56 |                    | 20.03 ± 11.31                  | 51.37 ± 13.12                  | 1.96E+05                             | 2.47 ± 0.12                                               | 83.20                                    | 0.01                                     |
| 34  | PCPT_NSB_57 |                    | 21.62 ± 8.19                   | 63.98 ± 8.39                   | 1.37E+04                             | 3.33 ± 0.54                                               | 65.64                                    | 0.02                                     |
| 35  | PCPT_NSB_58 |                    | 21.51 ± 7.01                   | 68.47 ± 8.03                   | 3.29E+04                             | 6.56 ± 0.98                                               | 103.17                                   | 0.02                                     |
| 37  | PCPT_NSB_60 |                    | 23.57 ± 11.35                  | 57.97 ± 11.33                  | 8.88E+04                             | 5.69 ± 0.34                                               | 56.77                                    | 0.01                                     |
| 39  | PCPT_NSB_62 |                    | 25.48 ± 10.80                  | 56.46 ± 10.06                  | 3.52E+04                             | 1.33 ± 0.10                                               | 25.75                                    | 0.02                                     |
| 40  | PCPT_NSB_63 |                    | 24.20 ± 10.62                  | 47.64 ± 11.15                  | 2.43E+04                             | 6.93 ± 1.50                                               | 129.25                                   | 0.01                                     |
| 41  | PCPT_NSB_65 |                    | 27.02 ± 10.82                  | 52.40 ± 11.07                  | 2.05E+04                             | 3.34 ± 0.40                                               | 60.46                                    | 0.01                                     |
| 42  | PCPT_NSB_66 |                    | 22.50 ± 6.03                   | 58.59 ± 8.88                   | 9.48E+04                             | 7.00 ± 0.34                                               | 88.18                                    | 0.04                                     |
| 3   | PCPT_NSB_5  | Long-Lasted Rain   | 30.67 ± 9.62                   | 46.25 ± 10.57                  | 1.16E+04                             | 3.72 ± 0.54                                               | 34.77                                    | 0.04                                     |
| 4   | PCPT_NSB_6  |                    | 33.69 ± 9.60                   | 42.19 ± 9.94                   | 1.35E+04                             | 10.51 ± 1.20                                              | 40.76                                    | 0.07                                     |
| 7   | PCPT_NSB_9  |                    | 34.89 ± 12.21                  | 30.76 ± 0.74                   | 1.67E+04                             | 5.77 ± 0.64                                               | 34.37                                    | 0.04                                     |
| 8   | PCPT_NSB_10 |                    | 30.23 ± 10.32                  | 44.30 ± 11.62                  | 5.23E+04                             | 3.06 ± 0.14                                               | 13.06                                    | 0.04                                     |
| 12  | PCPT_NSB_17 |                    | 28.71 ± 10.98                  | 52.15 ± 9.98                   | 7.14E+04                             | 7.85 ± 0.66                                               | 74.67                                    | 0.03                                     |
| 14  | PCPT_NSB_20 |                    | 26.51 ± 9.01                   | 54.43 ± 10.91                  | 2.77E+04                             | 0.96 ± 0.06                                               | 6.85                                     | 0.02                                     |
| 18  | PCPT_NSB_26 |                    | 14.81 ± 10.75                  | 51.91 ± 11.22                  | 2.04E+05                             | 0.89 ± 0.03                                               | 12.64                                    | 0.02                                     |
| 20  | PCPT_NSB_29 |                    | 5.94 ± 8.97                    | 41.51 ± 11.64                  | 2.07E+04                             | 1.74 ± 0.21                                               | 28.48                                    | 0.01                                     |
| 28  | PCPT_NSB_49 |                    | 4.42 ± 2.28                    | 57.95 ± 5.32                   | 7.69E+04                             | 1.13 ± 0.05                                               | 12.65                                    | 0.02                                     |
| 30  | PCPT_NSB_52 |                    | 9.57 ± 1.66                    | 65.47 ± 4.02                   | 1.26E+05                             | 1.17 ± 0.05                                               | 9.23                                     | 0.01                                     |
| 31  | PCPT_NSB_54 |                    | 18.32 ± 10.31                  | 52.92 ± 11.46                  | 2.42E+04                             | 1.19 ± 0.32                                               | 86.29                                    | 0.01                                     |
| 36  | PCPT_NSB_59 |                    | 24.66 ± 11.30                  | 48.02 ± 14.00                  | 6.3E+04                              | 3.35 ± 0.28                                               | 69.13                                    | 0.02                                     |
| 38  | PCPT_NSB_61 |                    | 26.91 ± 8.74                   | 57.18 ± 9.31                   | 2.02E+04                             | 2.83 ± 0.21                                               | 19.25                                    | 0.03                                     |
| 9   | PCPT_NSB_11 | Weak Rain          | 31.21 ± 10.43                  | 48.01 ± 10.87                  | 1.27E+04                             | 2.12 ± 0.21                                               | 9.09                                     | 0.03                                     |
| 13  | PCPT_NSB_19 |                    | 27.99 ± 9.41                   | 51.91 ± 11.35                  | 1.04E+04                             | 1.05 ± 0.07                                               | 4.01                                     | 0.03                                     |
| 25  | PCPT_NSB_46 |                    | 3.54 ± 0.77                    | 68.65 ± 1.14                   | 1.15E+04                             | 2.17 ± 0.45                                               | 31.44                                    | 0.03                                     |
| 26  | PCPT_NSB_47 |                    | 8.86 ± 2.91                    | 70.68 ± 2.29                   | 3.9E+04                              | 2.05 ± 0.37                                               | 83.67                                    | 0.01                                     |
| 32  | PCPT_NSB_55 |                    | 16.14 ± 10.16                  | 61.02 ± 12.75                  | 1.71E+04                             | 0.21 ± 0.06                                               | 15.60                                    | 0.01                                     |

**Table S3.** Summary of the precipitation Intensity and Particles Size.

| Precipitation Type          | Precipitation Properties                                  |                                          |                                          |                                                                  |                                                 |                                                 |                                |                                      |
|-----------------------------|-----------------------------------------------------------|------------------------------------------|------------------------------------------|------------------------------------------------------------------|-------------------------------------------------|-------------------------------------------------|--------------------------------|--------------------------------------|
|                             | Average Intensity (mm hr <sup>-1</sup> ) ± standard error | Maximum Intensity (mm hr <sup>-1</sup> ) | Minimum Intensity (mm hr <sup>-1</sup> ) | Average No. of detected precipitation particles ± standard error | Maximum No. of detected precipitation particles | Minimum No. of detected precipitation particles | Hydrometeor Mode diameter (mm) | Maximum diameter of hydrometeor (mm) |
| Snow<br>*(n=6)              | 1.27E+00 ± 3.61E-01                                       | 26.68                                    | 0.01                                     | 2E+05 ± 2E+02                                                    | 6.58E+05                                        | 1.07E+04                                        | 0.44                           | 17                                   |
| Hail/Thunderstorm<br>(n=18) | 5.27E+00 ± 7.01E-01                                       | 129.25                                   | 0.01                                     | 7.13E+04 ± 1.93E+04                                              | 3.49E+05                                        | 1.37E+04                                        | 0.44                           | 17                                   |
| Long-Lasted Rain<br>(n=13)  | 3.4E+00 ± 8.26E-01                                        | 86.29                                    | 0.01                                     | 5.6E+04 ± 1.54E+04                                               | 2.04E+05                                        | 1.16E+04                                        | 0.44                           | 17                                   |
| Weak Rain<br>(n=5)          | 1.52E+00 ± 3.86E-01                                       | 83.67                                    | 0.01                                     | 1.81E+04 ± 5.35E+03                                              | 3.9E+04                                         | 1.04E+04                                        | 0.31                           | 5.5                                  |

\* n is the number of samples in each precipitation category.

## S2. Cooling Rate Dependency and Time Trial Test

### S2.1. Cooling Rate Dependency Test

For this study, we have cooled the 3  $\mu\text{L}$  volume droplets from all our precipitation samples in the WT-CRAFT system at a cooling rate of  $1\text{ }^{\circ}\text{C min}^{-1}$ . However, we observe a rapid cooling rate of  $2\text{--}3\text{ }^{\circ}\text{C min}^{-1}$  in the invigorating convective systems like hurricanes and thunderstorms depending on the vertical updrafts in that weather system. This variation in the cooling rate was mimicked at laboratory conditions by conducting our immersion freezing tests at different cooling rates. To understand the effect of different cooling rates on INP measurements, we have selected a hail/thunderstorm sample (ID# 16), which was observed during the landfall of Hurricane Michael in 2018. **Figure S1** shows the frozen fraction curves and  $n_{\text{INP}}$  values for this chosen sample at three different cooling rates (i.e., at 1, 2, and  $3\text{ }^{\circ}\text{C min}^{-1}$ ). Throughout this test, the  $T$  discrepancy was within the system's uncertainty (i.e.,  $\pm 0.5\text{ }^{\circ}\text{C}$ ).

A slight decrease in freezing activity (within a factor of 2-3) was observed with an increase in cooling rate as shown in **Fig. S1**. This negligible variation in the freezing behavior highlights that the sensitivity of freezing to  $\Delta T$  ( $^{\circ}\text{C}$ ) is much higher compared to  $\Delta t$  (min), supporting previous simulation studies (Ervens and Feingold, 2013). This result also supports our assumption for this study, that freezing activity is independent of time following the singular freezing theory (Niedermeier et al., 2011).

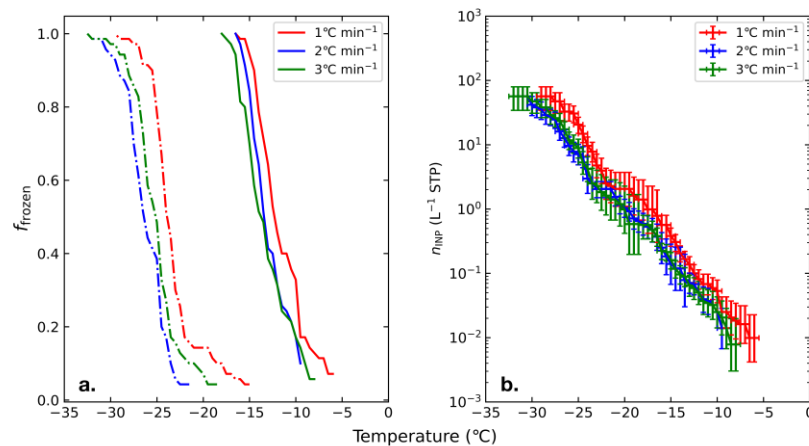

**Figure S1.** The cooling rate dependency tests for a hail/thunderstorm sample (ID# 16) showing (a) frozen fraction curves, the dash-dot curves are for a serial dilution fold of 100 and (b)  $n_{\text{INP}}$  curves. The X-axis error bars represent constant uncertainty of  $\pm 0.5\text{ }^{\circ}\text{C}$  in temperature. The Y-axis error bars show the 95% confidence interval for  $n_{\text{INP}}$  shown only for one test here.

### S2.2. Time Trial Test

There was a time gap between our sample collection day and the day of droplet freezing assay measurements. The effect of this delay in measurements on immersion freezing propensity was examined by systematically carrying out time trial tests on a hail/thunderstorm sample (ID# 16). Initially the samples were stored at  $4\text{ }^{\circ}\text{C}$  in the refrigerator from the day of sample collection until we conducted droplet freezing assay measurements. Multiple immersion freezing experiments were carried out for the same sample every two weeks since the first

droplet freezing assay measurement. Overall, three-time trial tests were conducted on hail/thunderstorm sample (ID# 16) over a period of one month.

We observed a slight decrease in the freezing efficiency with time (**Fig. S2**), but not more than a factor of 3-4. Therefore, these results showed that our immersion freezing measurements were not affected by the delay in droplet freezing assay experiments, agreeing with the previous studies, such as Murray et al. (2012).

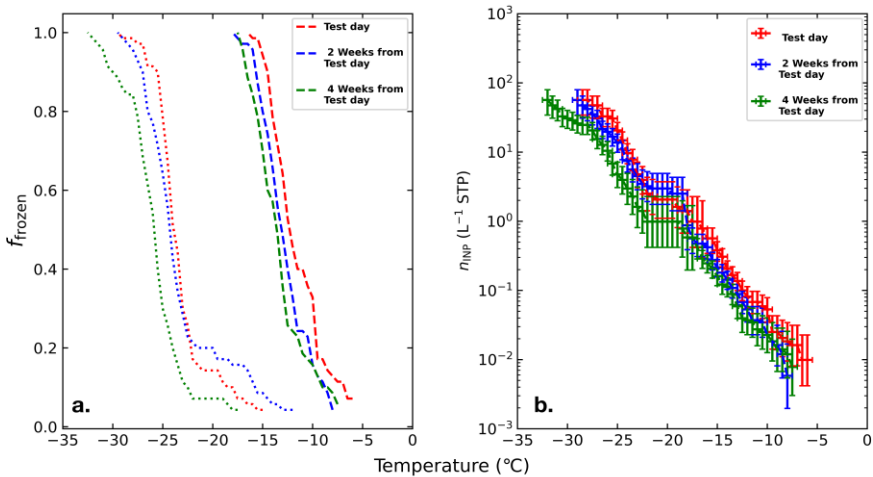

**Figure S2.** The time trial tests for a hail/thunderstorm sample (ID# 16) showing (a) frozen fraction curves, the dotted curves are for a serial dilution fold of 100 and (b)  $n_{\text{INP}}$  curves. The X-axis error bars represent constant uncertainty of  $\pm 0.5^{\circ}\text{C}$  in temperature. The Y-axis error bars show the 95% confidence interval for  $n_{\text{INP}}$  shown only for one test here.

S4. INP Variation with Precipitation Category

Table S4. Summary of precipitation category-wise average and maximum  $n_{\text{INP}}$ .

| Precipitation Type          | $n_{\text{INP}}$ ( $\text{L}^{-1}$ STP) values |                                 |                                 |                                 |                                 |                                             |                                             |                                             |                                             |
|-----------------------------|------------------------------------------------|---------------------------------|---------------------------------|---------------------------------|---------------------------------|---------------------------------------------|---------------------------------------------|---------------------------------------------|---------------------------------------------|
|                             | $(n_{\text{INP}})_{\text{max}}$                | $(n_{\text{INP}})_{\text{max}}$ | $(n_{\text{INP}})_{\text{max}}$ | $(n_{\text{INP}})_{\text{max}}$ | $(n_{\text{INP}})_{\text{max}}$ | Average $n_{\text{INP}} \pm$ standard error |
|                             | at -5°C                                        | at -10°C                        | at -15°C                        | at -20°C                        | at -25°C                        | at -10°C                                    | at -15°C                                    | at -20°C                                    | at -25°C                                    |
| Snow<br>*(n=6)              | 3.46E-02                                       | 1.62E+00                        | 2.98E+00                        | 1.62E+01                        | 6.50E+01                        | 4.38E-01 ± 2.98E-01                         | 7.84E-01 ± 4.47E-01                         | 5.74E+00 ± 2.46E+00                         | 2.90E+01 ± 1.00E+01                         |
| Hail/Thunderstorm<br>(n=18) | 1.13E-01                                       | 9.88E-01                        | 2.51E+00                        | 1.61E+01                        | 1.13E+03                        | 1.43E-01 ± 5.76E-02                         | 5.46E-01 ± 1.71E-01                         | 4.17E+00 ± 1.19E+00                         | 1.18E+02 ± 6.42E+01                         |
| Long-Lasted Rain<br>(n=13)  | 5.84E-03                                       | 2.89E-01                        | 1.4E+00                         | 5.84E+00                        | 1.32E+02                        | 9.51E-02 ± 2.67E-02                         | 3.15E-01 ± 1.07E-01                         | 2.25E+00 ± 5.59E-01                         | 4.72E+01 ± 1.21E+01                         |
| Weak Rain<br>(n=5)          | 5.84E-02                                       | 6.50E-01                        | 1.00E+00                        | 4.74E+00                        | 2.05E+02                        | 1.97E-01 ± 1.52E-01                         | 3.10E-01 ± 1.81E-01                         | 1.34E+00 ± 8.57E-01                         | 4.60E+01 ± 3.99E+01                         |

\* n is the number of samples in each precipitation category.

#### S4. Wet Deposition

This section explains potential implications of aerosol particle scavenging in our precipitation data. First, we assessed the hourly averaged PM values right before vs. after 28 precipitation events, which had relevant PM data. Our measurements of PM<sub>1</sub>, PM<sub>2.5</sub>, and PM<sub>10</sub> are summarized in **Table 1** of the main manuscript. As seen in the table, we confirm the trend of PM reduction for all three PM categories after precipitation in part due to scavenging.

Second, using the PM data measured before precipitation (typically an hour prior or the most adjacent data to each precipitation event) in **Table 1**, we estimated the “first order” impact of wet deposition – i.e., estimating the amount of scavenged aerosol particle mass,  $M_{sv}$  ( $\mu\text{g m}^{-3}$ ), during each precipitation event. In the first step of this estimation, we converted our PM data into three size-segregated bins with different median diameters (MDs), including PM<sub>1</sub>-PM<sub>0</sub> (MD = 0.5  $\mu\text{m}$ ), PM<sub>2.5</sub>-PM<sub>1</sub> (MD = 1.75  $\mu\text{m}$ ), and PM<sub>10</sub>-PM<sub>2.5</sub> (MD = 6.25  $\mu\text{m}$ ). This conversion was implemented to incorporate with the fact that aerosol particle scavenging efficiencies vary for different aerosol particle sizes. The resulting size-segregated data were used as the ground level aerosol particle mass,  $M_{gl}$  ( $\mu\text{g m}^{-3}$ ), in this analysis. Subsequently, we estimated the mass concentration of aerosol particles below cloud,  $M_{bc}$  ( $\mu\text{g m}^{-3}$ ), by the pressure scaling method (Eqns. 11-30 of Ch. 11 in Pruppacher and Klett, 2010), assuming a well-mixed boundary layer around West Texas, which is part of Southern Great Plains (SGP) (Delle Monache et al., 2004; Schmid and Niyogi, 2012; Zhu et al., 2001). It is important to note that Delle Monache et al. (2004) found that aerosol measurements made at the surface are representative of those within the atmospheric boundary layer at SGP. Since Dong et al. (2008) previously showed a typical cloud base height in the range of 0.5 – 3.0 km above ground level (AGL) for the SGP region, we estimated  $M_{bc}$  at 0.5 km ( $M_{bc,0.5\text{km}}$ ) and 3.0 km ( $M_{bc,3.0\text{km}}$ ) to cover a reasonable range of  $M_{bc}$ . On average, the relative difference between  $M_{bc,0.5\text{km}}$  and  $M_{bc,3.0\text{km}}$  is  $\approx 14\%$ , which is smaller than our PM sensor error ( $\pm 27\%$ ). Further, a lapse rate of  $-7.1\text{ }^{\circ}\text{C km}^{-1}$ , which is representative for the SGP region according to Dong et al. (2008), was used as part of our  $M_{bc}$  calculation, assuming this number holds true for the entire SGP region including West Texas region. We also estimated the column-integrated mean mass concentration,  $M_{cm}$  ( $\mu\text{g m}^{-3}$ ), of the surface - 3.0 km AGL. We examined precipitation scavenging of particles using both  $M_{bc}$  and  $M_{cm}$  as an original aerosol particle mass parameter,  $M_0$ , to estimate  $M_{sv}$ . The summary of our size-segregated  $M_0$  is provided in **Table S5**.

Third, we computed the scavenging coefficient ( $\Lambda$ ,  $\text{s}^{-1}$ ) for each precipitation event as a function of aerosol particle size ( $d$ ,  $\mu\text{m}$ ), for which we used our PM MDs, and precipitation intensity ( $R$ , mm/h). In particular, to obtain our  $\Lambda$  values, we used the parameterization method described in Wang et al. (2014). Briefly, the scavenging rate,  $\Lambda$ , is governed by Eqn. 4 of Wang et al. (2014);

$$\log_{10}(\Lambda(d, R)) = \log_{10}(A(d)) + B(d)(\log_{10}R), \quad [\text{Eqn. S1}]$$

where  $A$  is the hydrometeor-specific effective cross section area coefficient ( $\text{s}^{-1}$ ),  $B$  is the coefficient governing the regression slope between  $R$  and  $\Lambda$ , in which both  $A$  and  $B$  are as a function of  $d$ . We note that our parameterization was performed for snow and non-snow precipitation (i.e., rain) separately. In short, Eqns. 6 and 8 in Wang et al. (2014) were applied to derive the  $A$  values of rain and snow, respectively. Likewise, the regression slope coefficient,  $B$ , was derived using Eqns. 7 and 9 in Wang et al. (2014) for rain and snow individually. The resulting  $\Lambda$  values and all coefficients are summarized in **Table S6**. It is noteworthy that Wang et al. (2014) reports



up to  $\pm 50\%$  uncertainty in their parameterization, especially for snow and aerosol particle size between 1 and 4  $\mu\text{m}$  in diameter.

Fourth, following the Seinfeld and Pandis textbook chapter (1996, Ch. 20.3: precipitation scavenging of particles), we estimated  $M_{sv}$  (assuming a constant  $\Lambda$  over precipitation) as follows,

$$M_{sv} = M_0 - M_t = M_0 - M_0 e^{-\Lambda t}, \quad [\text{Eqn. S2}]$$

in which,  $M_t$  is the amount of aerosol particle mass per unit volume of air after  $t$  seconds of precipitation. Thus, the amount of aerosol particle mass concentration removed by scavenging is estimated as  $M_0 - M_t$ . The summary of size-resolved and summed  $M_{sv}$  is provided in **Table S7**. We note that the estimated scavenging efficiencies of snow are relatively high compared to those of rain as expected (IDs #19 and #21 in **Table S6** – almost all scavenged). However, the  $M_{sv}$  values of these IDs are not substantially higher compared to those of other rain samples in part due to low  $M_0$  (**Table S5**). As we found in  $M_0$ , the relative difference between  $M_{bc\_0.5\text{km}}$  and  $M_{bc\_3.0\text{km}}$  is on average  $< 15\%$ .

Finally, we assessed the impact of  $M_{sv}$  on INP by estimating the INP concentration of scavenged aerosol particles as a function of  $T$ ,  $n_{INP,sv}(T)$ , using the modified version of equation presented in Hiranuma et al. (2020);

$$n_{INP,sv}(T)(L^{-1}) = n_{s,geo}(T)(m^{-2}) \times \text{Geometric SSA} \left( \frac{m^2}{g} \right) \times M_{sv} \left( \frac{g}{L} \right), \quad [\text{Eqn. S3}]$$

where  $n_{geo}(T)$  is ice nucleation active surface site density derived using the  $n_{s,geo}(T)$  parameterization given in Hiranuma et al. (2020; Eqn. Field\_Min), geometric SSA value is approximately  $0.4 \text{ m}^2\text{g}^{-1}$  as described in Hiranuma et al. (2020),  $M_{sv}$  is based on our  $M_{gl}$ ,  $M_{bc\_0.5\text{km}}$ ,  $M_{bc\_3.0\text{km}}$ , and  $M_{cm}$ . Though other  $n_{geo}(T)$  parameterizations may also be applicable, using this particular parameterization might be fair for the following three reasons; (1) this parameterization is derived from  $\text{PM}_{10}$  mass concentration data in somewhat similar manner, (2) organic dominant agricultural dust is a predominant local  $\text{PM}_{10}$  source in West Texas throughout the year ( $411.6 \pm 3.0 \mu\text{g m}^{-3}$  Hiranuma et al., 2020) and, thus, may largely contribute to  $M_{sv}$ , (3) we observed that the INP propensity measured during our recent field campaign, called the TxTEST campaign held in West Texas in 2019, exhibits very similar features to what is seen in the Field\_Min parameterization (not shown but the data are available upon request, Hiranuma et al., in prep.).

**Table S8** shows the average  $n_{INP,sv}(T)$  at four different  $T$ s based on scavenged mass ( $M_{sv,M0}$ ) simulated with four different  $M_0$  values, including  $\text{PM}_{10}$  measured at ground level, gl, estimated  $\text{PM}_{10}$  for below cloud at 0.5 km AGL, bc\_0.5km, as well as 3.0 km AGL, bc\_3.0km, and column-integrated mean  $\text{PM}_{10}$ , cm. We also show the average INP concentrations of our precipitation samples,  $n_{INP,pcpt}(T) [L^{-1}]$ , for comparison. It should be noted that the total uncertainty of our  $n_{INP,pcpt}(T)$  derived from errors in our PM measurement, scavenging coefficient calculation, and immersion freezing method is estimated to be  $\pm 61.5\%$ . **Figure S3** shows the estimated  $n_{INP,sv}$  for individual samples at four different  $T$ s based on  $M_{sv,cm}$  in comparison to individual  $n_{INP,pcpt}(T)$  time series. As seen in these table and figure, our estimated  $n_{INP,sv}(T)$  values are constantly more than an order magnitude lower at the least as compared to  $n_{INP,pcpt}(T)$ . This trend is true across all ranges of examined  $T$ s regardless of the choice of  $M_{sv,M0}$ . The overall deviation between  $n_{INP,sv}(M_{bc\_0.5\text{km}})$  and  $n_{INP,sv}(M_{bc\_3.0\text{km}})$  is  $14.6\%$  for  $-25^\circ\text{C} \leq T \leq -10^\circ\text{C}$ . Due to many assumptions we made for this analysis, our results of  $n_{INP,sv}(T)$  being much lower than  $n_{INP,pcpt}(T)$  may not be conclusive and indeed requires further detailed study. Nevertheless, our estimates suggest the presence of  $n_{INP,sv}(T)$  in our precipitation samples, but may be negligible for this study.

Table S5. Summary of our size-segregated  $M_0$ .

|     |             | $M_0 [\mu\text{g m}^{-3}]$ |               |                |                               |               |                |                               |               |                |                 |               |                |
|-----|-------------|----------------------------|---------------|----------------|-------------------------------|---------------|----------------|-------------------------------|---------------|----------------|-----------------|---------------|----------------|
| ID# | Sample#     | $M_{\text{gl}}$            |               |                | $M_{\text{bc } 0.5\text{km}}$ |               |                | $M_{\text{bc } 3.0\text{km}}$ |               |                | $M_{\text{cm}}$ |               |                |
|     |             | PM1-<br>PM0                | PM2.5-<br>PM1 | PM10-<br>PM2.5 | PM1-<br>PM0                   | PM2.5-<br>PM1 | PM10-<br>PM2.5 | PM1-<br>PM0                   | PM2.5-<br>PM1 | PM10-<br>PM2.5 | PM1-<br>PM0     | PM2.5-<br>PM1 | PM10-<br>PM2.5 |
| 1   | PCPT_NSB_1  | 1.97                       | 2.12          | 2.10           | 1.91                          | 2.06          | 2.04           | 1.64                          | 1.77          | 1.75           | 1.81            | 1.94          | 1.92           |
| 2   | PCPT_NSB_2  | 0.01                       | 1.80          | 0.30           | 0.01                          | 1.75          | 0.29           | 0.01                          | 1.50          | 0.25           | 0.01            | 1.65          | 0.28           |
| 3   | PCPT_NSB_5  | 4.67                       | 1.07          | 5.06           | 4.53                          | 1.04          | 4.91           | 3.89                          | 0.89          | 4.22           | 4.28            | 0.98          | 4.64           |
| 4   | PCPT_NSB_6  | 3.76                       | 2.20          | 2.91           | 3.65                          | 2.14          | 2.83           | 3.14                          | 1.84          | 2.43           | 3.45            | 2.02          | 2.67           |
| 5   | PCPT_NSB_7  | 0                          | 0.56          | 0.17           | 0                             | 0.54          | 0.16           | 0                             | 0.46          | 0.14           | 0               | 0.51          | 0.15           |
| 8   | PCPT_NSB_10 | 7.48                       | 2.42          | 4.88           | 7.26                          | 2.35          | 4.74           | 6.24                          | 2.01          | 4.07           | 6.86            | 2.21          | 4.47           |
| 9   | PCPT_NSB_11 | 5.76                       | 2.41          | 4.61           | 5.59                          | 2.34          | 4.47           | 4.81                          | 2.01          | 3.84           | 5.28            | 2.21          | 4.22           |
| 10  | PCPT_NSB_15 | 14.29                      | 1.79          | 14.72          | 13.88                         | 1.74          | 14.29          | 11.93                         | 1.49          | 12.28          | 13.11           | 1.64          | 13.50          |
| 11  | PCPT_NSB_16 | 4.91                       | 0.51          | 5.11           | 4.77                          | 0.49          | 4.96           | 4.08                          | 0.42          | 4.25           | 4.50            | 0.47          | 4.68           |
| 12  | PCPT_NSB_17 | 4.55                       | 1.86          | 4.22           | 4.42                          | 1.81          | 4.10           | 3.79                          | 1.55          | 3.51           | 4.17            | 1.71          | 3.87           |
| 13  | PCPT_NSB_19 | 0.05                       | 1.23          | 5.02           | 0.05                          | 1.20          | 4.87           | 0.04                          | 1.03          | 4.18           | 0.04            | 1.13          | 4.60           |
| 14  | PCPT_NSB_20 | 1.78                       | 2.53          | 1.58           | 1.73                          | 2.46          | 1.53           | 1.48                          | 2.11          | 1.31           | 1.63            | 2.32          | 1.45           |
| 15  | PCPT_NSB_23 | 3.87                       | 1.87          | 3.81           | 3.75                          | 1.82          | 3.70           | 3.21                          | 1.55          | 3.16           | 3.54            | 1.71          | 3.49           |
| 16  | PCPT_NSB_24 | 1.59                       | 3.39          | 0.80           | 1.54                          | 3.29          | 0.78           | 1.31                          | 2.79          | 0.66           | 1.45            | 3.09          | 0.73           |
| 18  | PCPT_NSB_26 | 0.66                       | 2.17          | 0.36           | 0.64                          | 2.11          | 0.35           | 0.54                          | 1.79          | 0.30           | 0.60            | 1.98          | 0.33           |
| 19  | PCPT_NSB_27 | 0                          | 0.01          | 0.07           | 0                             | 0.01          | 0.07           | 0                             | 0.01          | 0.06           | 0               | 0.01          | 0.06           |
| 21  | PCPT_NSB_30 | 0.76                       | 1.87          | 0.55           | 0.74                          | 1.81          | 0.54           | 0.62                          | 1.53          | 0.45           | 0.69            | 1.70          | 0.50           |
| 25  | PCPT_NSB_46 | 1.46                       | 3.06          | 0.92           | 1.41                          | 2.97          | 0.89           | 1.20                          | 2.51          | 0.76           | 1.33            | 2.79          | 0.84           |
| 27  | PCPT_NSB_48 | 0                          | 0.43          | 0              | 0                             | 0.41          | 0              | 0                             | 0.35          | 0              | 0               | 0.39          | 0              |
| 34  | PCPT_NSB_57 | 29.65                      | 0             | 29.30          | 28.76                         | 0             | 28.42          | 24.58                         | 0             | 24.29          | 27.12           | 0             | 26.79          |
| 35  | PCPT_NSB_58 | 12.45                      | 0.80          | 11.15          | 12.08                         | 0.77          | 10.81          | 10.32                         | 0.66          | 9.24           | 11.39           | 0.73          | 10.19          |
| 36  | PCPT_NSB_59 | 10.52                      | 1.00          | 9.68           | 10.20                         | 0.97          | 9.39           | 8.74                          | 0.83          | 8.04           | 9.63            | 0.92          | 8.86           |
| 37  | PCPT_NSB_60 | 9.74                       | 0.92          | 8.09           | 9.45                          | 0.89          | 7.85           | 8.09                          | 0.76          | 6.72           | 8.91            | 0.84          | 7.40           |
| 38  | PCPT_NSB_61 | 4.40                       | 1.52          | 4.16           | 4.27                          | 1.47          | 4.04           | 3.66                          | 1.26          | 3.46           | 4.03            | 1.39          | 3.81           |
| 39  | PCPT_NSB_62 | 0.04                       | 1.52          | 0.25           | 0.04                          | 1.47          | 0.24           | 0.03                          | 1.26          | 0.21           | 0.04            | 1.39          | 0.23           |
| 40  | PCPT_NSB_63 | 2.22                       | 2.13          | 2.19           | 2.15                          | 2.07          | 2.12           | 1.84                          | 1.77          | 1.81           | 2.03            | 1.95          | 2.00           |
| 41  | PCPT_NSB_65 | 1.69                       | 2.30          | 1.31           | 1.64                          | 2.23          | 1.27           | 1.41                          | 1.91          | 1.09           | 1.55            | 2.11          | 1.20           |
| 42  | PCPT_NSB_66 | 1.75                       | 1.13          | 2.89           | 1.70                          | 1.10          | 2.80           | 1.45                          | 0.94          | 2.40           | 1.60            | 1.03          | 2.64           |

**Table S6.** Summary of scavenging efficiencies,  $\Lambda$ , and other coefficients for estimating  $\Lambda$ .

| ID# | Sample#     | Precipitation type | $R$<br>[mm<br>hr <sup>-1</sup> ] | $A(d)$ [s <sup>-1</sup> ] |                 |                 | $B(d)$         |                 |                 | $\Lambda(d,R)$ [s <sup>-1</sup> ] |                 |                 |
|-----|-------------|--------------------|----------------------------------|---------------------------|-----------------|-----------------|----------------|-----------------|-----------------|-----------------------------------|-----------------|-----------------|
|     |             |                    |                                  | MD = 0.5<br>μm            | MD =<br>1.75 μm | MD =<br>6.25 μm | MD = 0.5<br>μm | MD =<br>1.75 μm | MD =<br>6.25 μm | MD = 0.5<br>μm                    | MD = 1.75<br>μm | MD =<br>6.25 μm |
| 1   | PCPT_NSB_1  | Hail/Thunderstorm  | 11.08                            | 4.06E-07                  | 9.08E-07        | 2.93E-04        | 7.14E-01       | 7.30E-01        | 8.49E-01        | 2.26E-06                          | 5.26E-06        | 2.26E-03        |
| 2   | PCPT_NSB_2  | Hail/Thunderstorm  | 5.97                             | 4.06E-07                  | 9.08E-07        | 2.93E-04        | 7.14E-01       | 7.30E-01        | 8.49E-01        | 1.46E-06                          | 3.35E-06        | 1.34E-03        |
| 3   | PCPT_NSB_5  | Long-Lasted Rain   | 3.72                             | 4.06E-07                  | 9.08E-07        | 2.93E-04        | 7.14E-01       | 7.30E-01        | 8.49E-01        | 1.04E-06                          | 2.37E-06        | 8.95E-04        |
| 4   | PCPT_NSB_6  | Long-Lasted Rain   | 10.51                            | 4.06E-07                  | 9.08E-07        | 2.93E-04        | 7.14E-01       | 7.30E-01        | 8.49E-01        | 2.18E-06                          | 5.06E-06        | 2.16E-03        |
| 5   | PCPT_NSB_7  | Hail/Thunderstorm  | 3.95                             | 4.06E-07                  | 9.08E-07        | 2.93E-04        | 7.14E-01       | 7.30E-01        | 8.49E-01        | 1.08E-06                          | 2.48E-06        | 9.42E-04        |
| 8   | PCPT_NSB_10 | Long-Lasted Rain   | 3.06                             | 4.06E-07                  | 9.08E-07        | 2.93E-04        | 7.14E-01       | 7.30E-01        | 8.49E-01        | 9.04E-07                          | 2.06E-06        | 7.59E-04        |
| 9   | PCPT_NSB_11 | Weak Rain          | 2.12                             | 4.06E-07                  | 9.08E-07        | 2.93E-04        | 7.14E-01       | 7.30E-01        | 8.49E-01        | 6.95E-07                          | 1.57E-06        | 5.55E-04        |
| 10  | PCPT_NSB_15 | Hail/Thunderstorm  | 3.69                             | 4.06E-07                  | 9.08E-07        | 2.93E-04        | 7.14E-01       | 7.30E-01        | 8.49E-01        | 1.03E-06                          | 2.36E-06        | 8.89E-04        |
| 11  | PCPT_NSB_16 | Hail/Thunderstorm  | 5.52                             | 4.06E-07                  | 9.08E-07        | 2.93E-04        | 7.14E-01       | 7.30E-01        | 8.49E-01        | 1.38E-06                          | 3.16E-06        | 1.25E-03        |
| 12  | PCPT_NSB_17 | Long-Lasted Rain   | 7.85                             | 4.06E-07                  | 9.08E-07        | 2.93E-04        | 7.14E-01       | 7.30E-01        | 8.49E-01        | 1.77E-06                          | 4.09E-06        | 1.69E-03        |
| 13  | PCPT_NSB_19 | Weak Rain          | 1.05                             | 4.06E-07                  | 9.08E-07        | 2.93E-04        | 7.14E-01       | 7.30E-01        | 8.49E-01        | 4.21E-07                          | 9.42E-07        | 3.06E-04        |
| 14  | PCPT_NSB_20 | Long-Lasted Rain   | 0.96                             | 4.06E-07                  | 9.08E-07        | 2.93E-04        | 7.14E-01       | 7.30E-01        | 8.49E-01        | 3.95E-07                          | 8.82E-07        | 2.84E-04        |
| 15  | PCPT_NSB_23 | Hail/Thunderstorm  | 11.63                            | 4.06E-07                  | 9.08E-07        | 2.93E-04        | 7.14E-01       | 7.30E-01        | 8.49E-01        | 2.34E-06                          | 5.45E-06        | 2.35E-03        |
| 16  | PCPT_NSB_24 | Hail/Thunderstorm  | 2.88                             | 4.06E-07                  | 9.08E-07        | 2.93E-04        | 7.14E-01       | 7.30E-01        | 8.49E-01        | 8.64E-07                          | 1.96E-06        | 7.20E-04        |
| 18  | PCPT_NSB_26 | Long-Lasted Rain   | 0.89                             | 4.06E-07                  | 9.08E-07        | 2.93E-04        | 7.14E-01       | 7.30E-01        | 8.49E-01        | 3.73E-07                          | 8.31E-07        | 2.65E-04        |
| 19  | PCPT_NSB_27 | Snow Sample        | 2.96                             | 1.32E-05                  | 9.32E-05        | 1.93E-03        | 5.60E-01       | 5.63E-01        | 7.08E-01        | 2.43E-05                          | 1.72E-04        | 4.17E-03        |
| 21  | PCPT_NSB_30 | Snow Sample        | 1.16                             | 1.32E-05                  | 9.32E-05        | 1.93E-03        | 5.60E-01       | 5.63E-01        | 7.08E-01        | 1.43E-05                          | 1.01E-04        | 2.15E-03        |
| 25  | PCPT_NSB_46 | Weak Rain          | 2.17                             | 4.06E-07                  | 9.08E-07        | 2.93E-04        | 7.14E-01       | 7.30E-01        | 8.49E-01        | 7.06E-07                          | 1.60E-06        | 5.66E-04        |
| 27  | PCPT_NSB_48 | Hail/Thunderstorm  | 2.67                             | 4.06E-07                  | 9.08E-07        | 2.93E-04        | 7.14E-01       | 7.30E-01        | 8.49E-01        | 8.19E-07                          | 1.86E-06        | 6.75E-04        |
| 34  | PCPT_NSB_57 | Hail/Thunderstorm  | 3.33                             | 4.06E-07                  | 9.08E-07        | 2.93E-04        | 7.14E-01       | 7.30E-01        | 8.49E-01        | 9.60E-07                          | 2.19E-06        | 8.15E-04        |
| 35  | PCPT_NSB_58 | Hail/Thunderstorm  | 6.56                             | 4.06E-07                  | 9.08E-07        | 2.93E-04        | 7.14E-01       | 7.30E-01        | 8.49E-01        | 1.56E-06                          | 3.59E-06        | 1.45E-03        |
| 36  | PCPT_NSB_59 | Long-Lasted Rain   | 3.35                             | 4.06E-07                  | 9.08E-07        | 2.93E-04        | 7.14E-01       | 7.30E-01        | 8.49E-01        | 9.64E-07                          | 2.20E-06        | 8.19E-04        |
| 37  | PCPT_NSB_60 | Hail/Thunderstorm  | 5.69                             | 4.06E-07                  | 9.08E-07        | 2.93E-04        | 7.14E-01       | 7.30E-01        | 8.49E-01        | 1.41E-06                          | 3.23E-06        | 1.28E-03        |
| 38  | PCPT_NSB_61 | Long-Lasted Rain   | 2.83                             | 4.06E-07                  | 9.08E-07        | 2.93E-04        | 7.14E-01       | 7.30E-01        | 8.49E-01        | 8.54E-07                          | 1.94E-06        | 7.10E-04        |
| 39  | PCPT_NSB_62 | Hail/Thunderstorm  | 1.33                             | 4.06E-07                  | 9.08E-07        | 2.93E-04        | 7.14E-01       | 7.30E-01        | 8.49E-01        | 4.99E-07                          | 1.12E-06        | 3.75E-04        |
| 40  | PCPT_NSB_63 | Hail/Thunderstorm  | 6.93                             | 4.06E-07                  | 9.08E-07        | 2.93E-04        | 7.14E-01       | 7.30E-01        | 8.49E-01        | 1.62E-06                          | 3.73E-06        | 1.52E-03        |
| 41  | PCPT_NSB_65 | Hail/Thunderstorm  | 3.34                             | 4.06E-07                  | 9.08E-07        | 2.93E-04        | 7.14E-01       | 7.30E-01        | 8.49E-01        | 9.62E-07                          | 2.19E-06        | 8.17E-04        |
| 42  | PCPT_NSB_66 | Hail/Thunderstorm  | 7.00                             | 4.06E-07                  | 9.08E-07        | 2.93E-04        | 7.14E-01       | 7.30E-01        | 8.49E-01        | 1.63E-06                          | 3.76E-06        | 1.53E-03        |

205

210

**Table S7.** Summary of our size-segregated and total merged  $M_{sv}$ .

| ID # | Sample #    | $M_{sv} [\mu\text{g m}^{-3}]$ |           |            |       |                   |           |            |       |                   |           |            |       |                   |           |            |       |
|------|-------------|-------------------------------|-----------|------------|-------|-------------------|-----------|------------|-------|-------------------|-----------|------------|-------|-------------------|-----------|------------|-------|
|      |             | $M_{gl}$                      |           |            |       | $M_{bc, 0.5km}$   |           |            |       | $M_{bc, 3.0km}$   |           |            |       | $M_{cm}$          |           |            |       |
|      |             | PM1-PMO                       | PM2.5-PM1 | PM10-PM2.5 | Total | PM1-PMO           | PM2.5-PM1 | PM10-PM2.5 | Total | PM1-PMO           | PM2.5-PM1 | PM10-PM2.5 | Total | PM1-PMO           | PM2.5-PM1 | PM10-PM2.5 | Total |
| 1    | PCPT_NSB_1  | 0.46                          | 0.99      | 2.10       | 3.55  | 0.45              | 0.96      | 2.04       | 3.44  | 0.39              | 0.82      | 1.75       | 2.96  | 0.43              | 0.90      | 1.92       | 3.25  |
| 2    | PCPT_NSB_2  | 0.00 <sub>4</sub>             | 1.26      | 0.30       | 1.56  | 0.00 <sub>4</sub> | 1.22      | 0.29       | 1.51  | 0.00 <sub>3</sub> | 1.05      | 0.25       | 1.30  | 0.00 <sub>4</sub> | 1.15      | 0.28       | 1.43  |
| 3    | PCPT_NSB_5  | 1.06                          | 0.47      | 5.06       | 6.59  | 1.03              | 0.46      | 4.91       | 6.40  | 0.88              | 0.40      | 4.22       | 5.50  | 0.97              | 0.44      | 4.64       | 6.04  |
| 4    | PCPT_NSB_6  | 1.78                          | 1.71      | 2.91       | 6.40  | 1.73              | 1.66      | 2.83       | 6.22  | 1.49              | 1.43      | 2.43       | 5.35  | 1.63              | 1.57      | 2.67       | 5.87  |
| 5    | PCPT_NSB_7  | 0                             | 0.07      | 0.17       | 0.24  | 0                 | 0.07      | 0.16       | 0.23  | 0                 | 0.06      | 0.14       | 0.20  | 0                 | 0.07      | 0.15       | 0.22  |
| 8    | PCPT_NSB_10 | 0.79                          | 0.54      | 4.88       | 6.21  | 0.77              | 0.53      | 4.74       | 6.03  | 0.66              | 0.45      | 4.07       | 5.18  | 0.72              | 0.50      | 4.47       | 5.69  |
| 9    | PCPT_NSB_11 | 1.16                          | 0.96      | 4.61       | 6.73  | 1.13              | 0.93      | 4.47       | 6.53  | 0.97              | 0.80      | 3.84       | 5.61  | 1.07              | 0.88      | 4.22       | 6.17  |
| 10   | PCPT_NSB_15 | 2.79                          | 0.70      | 14.72      | 18.20 | 2.71              | 0.68      | 14.29      | 17.68 | 2.32              | 0.58      | 12.28      | 15.19 | 2.56              | 0.64      | 13.50      | 16.69 |
| 11   | PCPT_NSB_16 | 0.32                          | 0.07      | 5.11       | 5.50  | 0.31              | 0.07      | 4.96       | 5.34  | 0.26              | 0.06      | 4.25       | 4.57  | 0.29              | 0.07      | 4.68       | 5.04  |
| 12   | PCPT_NSB_17 | 1.66                          | 1.21      | 4.22       | 7.10  | 1.62              | 1.18      | 4.10       | 6.89  | 1.39              | 1.01      | 3.51       | 5.91  | 1.53              | 1.11      | 3.87       | 6.50  |
| 13   | PCPT_NSB_19 | 0.01                          | 0.27      | 5.02       | 5.29  | 0.00              | 0.26      | 4.87       | 5.14  | 0.00              | 0.22      | 4.18       | 4.40  | 0.00              | 0.24      | 4.60       | 4.85  |
| 14   | PCPT_NSB_20 | 0.56                          | 1.45      | 1.58       | 3.60  | 0.55              | 1.41      | 1.53       | 3.49  | 0.47              | 1.21      | 1.31       | 2.99  | 0.52              | 1.33      | 1.45       | 3.29  |
| 15   | PCPT_NSB_23 | 0.95                          | 0.90      | 3.81       | 5.66  | 0.92              | 0.88      | 3.70       | 5.50  | 0.79              | 0.75      | 3.16       | 4.70  | 0.87              | 0.83      | 3.49       | 5.18  |
| 16   | PCPT_NSB_24 | 0.72                          | 2.52      | 0.80       | 4.04  | 0.69              | 2.44      | 0.78       | 3.92  | 0.59              | 2.08      | 0.66       | 3.33  | 0.65              | 2.30      | 0.73       | 3.68  |
| 18   | PCPT_NSB_26 | 0.13                          | 0.87      | 0.36       | 1.37  | 0.13              | 0.84      | 0.35       | 1.33  | 0.11              | 0.72      | 0.30       | 1.13  | 0.12              | 0.79      | 0.33       | 1.25  |
| 19   | PCPT_NSB_27 | 0                             | 0.01      | 0.07       | 0.08  | 0                 | 0.01      | 0.07       | 0.08  | 0                 | 0.01      | 0.06       | 0.07  | 0                 | 0.01      | 0.06       | 0.07  |
| 21   | PCPT_NSB_30 | 0.62                          | 1.87      | 0.55       | 3.04  | 0.60              | 1.81      | 0.54       | 2.94  | 0.51              | 1.53      | 0.45       | 2.49  | 0.57              | 1.70      | 0.50       | 2.76  |
| 25   | PCPT_NSB_46 | 0.06                          | 0.27      | 0.92       | 1.25  | 0.06              | 0.26      | 0.89       | 1.21  | 0.05              | 0.22      | 0.76       | 1.02  | 0.05              | 0.24      | 0.84       | 1.13  |
| 27   | PCPT_NSB_48 | 0                             | 0.04      | 0          | 0.04  | 0                 | 0.04      | 0          | 0.04  | 0                 | 0.03      | 0          | 0.03  | 0                 | 0.04      | 0          | 0.04  |
| 34   | PCPT_NSB_57 | 6.97                          | 0         | 29.30      | 36.26 | 6.76              | 0         | 28.42      | 35.18 | 5.77              | 0         | 24.29      | 30.07 | 6.37              | 0         | 26.79      | 33.16 |
| 35   | PCPT_NSB_58 | 1.40                          | 0.19      | 11.15      | 12.73 | 1.36              | 0.19      | 10.81      | 12.35 | 1.16              | 0.16      | 9.24       | 10.56 | 1.28              | 0.17      | 10.19      | 11.64 |
| 36   | PCPT_NSB_59 | 3.60                          | 0.62      | 9.68       | 13.89 | 3.49              | 0.60      | 9.39       | 13.48 | 2.99              | 0.51      | 8.04       | 11.54 | 3.30              | 0.56      | 8.86       | 12.72 |
| 37   | PCPT_NSB_60 | 1.10                          | 0.22      | 8.09       | 9.41  | 1.07              | 0.22      | 7.85       | 9.14  | 0.92              | 0.18      | 6.72       | 7.82  | 1.01              | 0.20      | 7.40       | 8.62  |
| 38   | PCPT_NSB_61 | 0.60                          | 0.43      | 4.16       | 5.18  | 0.58              | 0.42      | 4.04       | 5.03  | 0.50              | 0.36      | 3.46       | 4.31  | 0.55              | 0.39      | 3.81       | 4.75  |
| 39   | PCPT_NSB_62 | 0.01                          | 0.49      | 0.25       | 0.74  | 0.01              | 0.47      | 0.24       | 0.72  | 0.01              | 0.40      | 0.21       | 0.62  | 0.01              | 0.44      | 0.23       | 0.68  |
| 40   | PCPT_NSB_63 | 1.26                          | 1.82      | 2.19       | 5.27  | 1.22              | 1.77      | 2.12       | 5.11  | 1.05              | 1.51      | 1.81       | 4.37  | 1.15              | 1.67      | 2.00       | 4.82  |
| 41   | PCPT_NSB_65 | 0.38                          | 1.00      | 1.31       | 2.69  | 0.37              | 0.97      | 1.27       | 2.61  | 0.31              | 0.83      | 1.09       | 2.24  | 0.34              | 0.92      | 1.20       | 2.46  |
| 42   | PCPT_NSB_66 | 0.19                          | 0.27      | 2.89       | 3.35  | 0.19              | 0.26      | 2.80       | 3.25  | 0.16              | 0.22      | 2.40       | 2.78  | 0.18              | 0.24      | 2.64       | 3.06  |

**Table S8.** Summary of cumulative  $n_{INP,sv}(T)$  compared to cumulative  $n_{INP,pcpt}(T)$  at four different  $T_s$ .

| $T$    | Average $n_{INP,sv}(T) [L^{-1}]$ |                       |                       |                       | Average $n_{INP,pcpt}(T)$<br>Error [L <sup>-1</sup> ] | ± Std. |
|--------|----------------------------------|-----------------------|-----------------------|-----------------------|-------------------------------------------------------|--------|
|        | $M_{sv,gl}$                      | $M_{sv,bc, 0.5km}$    | $M_{sv,bc, 3.0km}$    | $M_{sv,cm}$           |                                                       |        |
| -10 °C | $1.05 \times 10^{-3}$            | $1.02 \times 10^{-3}$ | $0.87 \times 10^{-3}$ | $0.96 \times 10^{-3}$ | $0.17 \pm 0.05$                                       |        |
| -15 °C | $3.93 \times 10^{-3}$            | $3.81 \times 10^{-3}$ | $3.26 \times 10^{-3}$ | $3.60 \times 10^{-3}$ | $0.48 \pm 0.10$                                       |        |
| -20 °C | $7.05 \times 10^{-2}$            | $6.84 \times 10^{-2}$ | $5.86 \times 10^{-2}$ | $6.45 \times 10^{-2}$ | $3.46 \pm 0.66$                                       |        |
| -25 °C | 2.06                             | 2.00                  | 1.71                  | 1.89                  | $74.74 \pm 28.28$                                     |        |

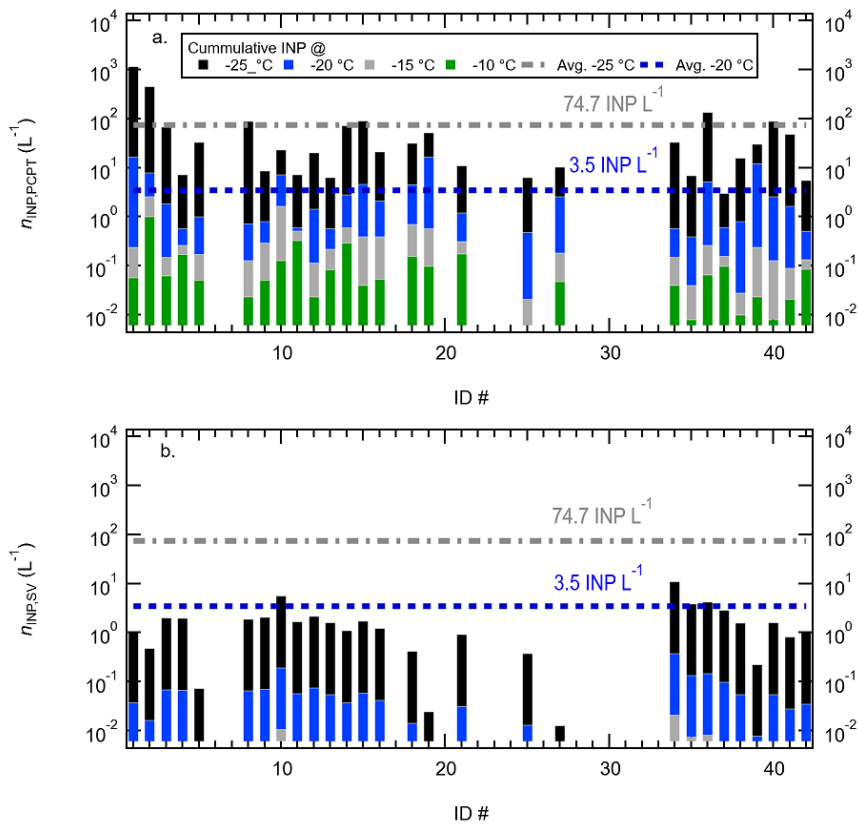

220 **Figure S3.** (a) Time series of cumulative  $n_{\text{INP}}$  ( $\text{L}^{-1}$  air) in each precipitation sample (ID# shown on the x-axis) at different  
temperatures. (b) Estimated  $n_{\text{INP,SV}}$  for a total of 28 samples analyzed based on  $M_{\text{SV,cm}}$ . All data above our  $n_{\text{INP}}$  detection limit  
of  $> 0.006 \text{ L}^{-1}$  are shown. The average  $n_{\text{INP}}$  values at  $-25 \text{ }^{\circ}\text{C}$  ( $74.7 \text{ L}^{-1}$ ) and  $-20 \text{ }^{\circ}\text{C}$  ( $3.5 \text{ L}^{-1}$ ) in all precipitation samples are shown  
to guide the reader's eye.

**S5.  $n_{\text{INP}}(T)$  distribution histogram**

We analyzed the  $n_{\text{INP}}(T)$  distribution histogram, categorized based on the season, precipitation type, and precipitation intensity, at -10, -15, -20, and -25 °C. The results are presented in **Figs. S4-6**. Briefly, we first binned our  $n_{\text{INP}}$  values at each temperature (i.e., -10, -15, -20, and -25 °C) into five equally sized bins by dividing the  $n_{\text{INP}}$  range (i.e., max - min) at that temperature by the number six. Subsequently, we visualized the frequency distribution of  $n_{\text{INP}}$  across different bins on a log scale based on the meteorological season in the U.S. (**Fig. S4**), precipitation type (**Fig. S5**), and maximum precipitation intensity (**Fig. S6**). From these results combined with other findings within this study, we found the followings:

- While no clear seasonal variations of  $n_{\text{INP}}$  values were apparent in part due to the limited number of samples, the analysis of yearlong ground level precipitation observation as well as INPs in the precipitation samples showed that the highest  $n_{\text{INP}}$  at -25 °C of 1,130 INP L<sup>-1</sup> coincided with a hail-involved severe thunderstorm event in the summer,
- The lowest cumulative INP at the same temperature, 3.0 INP L<sup>-1</sup>, was also found in one of our hail/thunderstorm samples collected during the summer, but the second lowest (3.0 INP L<sup>-1</sup>) was found from a snow sample collected in the winter, and
- Cumulative  $n_{\text{INP}}$  in our precipitation samples below -20 °C could be high in the samples collected while observing > 10 mm hr<sup>-1</sup> precipitation with notably large hydrometeor sizes (i.e., the size in ID# 1 = Sample# 1 > ID #37 = Sample# 60; see **Fig. 2b**).

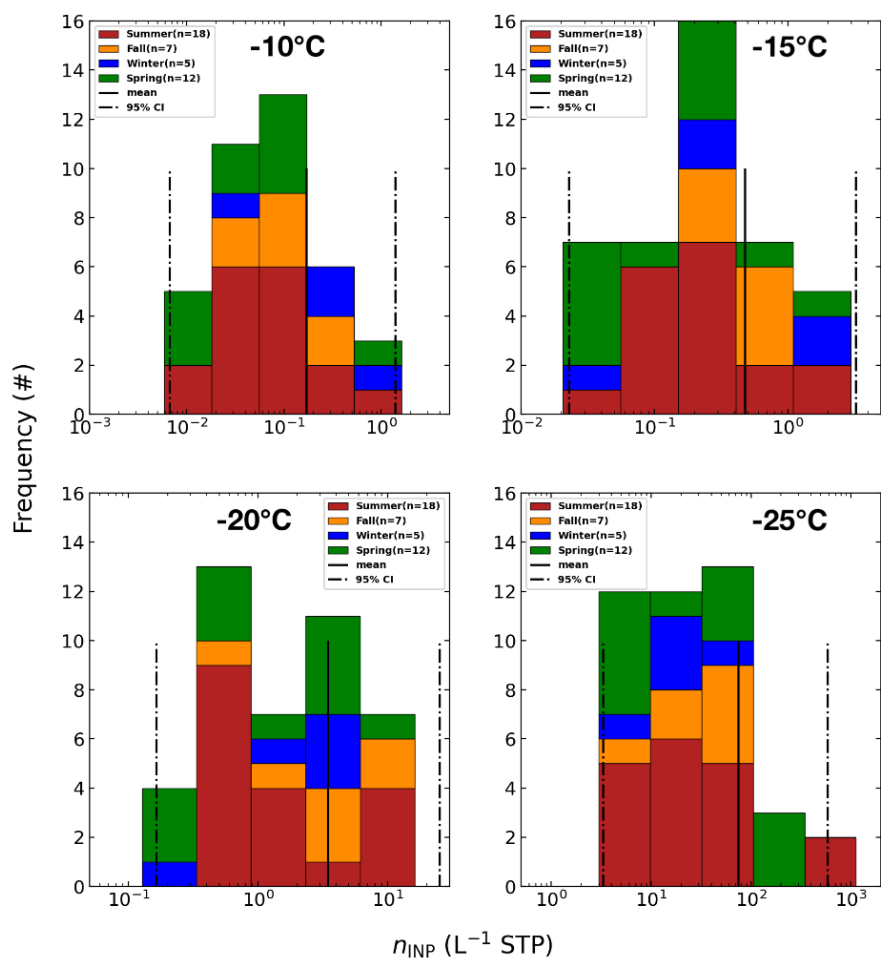

**Figure S4.** The  $n_{\text{INP}}(T)$  distribution histogram over different  $T$ s. The histogram frequency is color-categorized for different meteorological seasons (see **Table S1**). The vertical dashed lines and solid line represent 95% confidence intervals and mean  $n_{\text{INP}}(T)$  value, respectively.

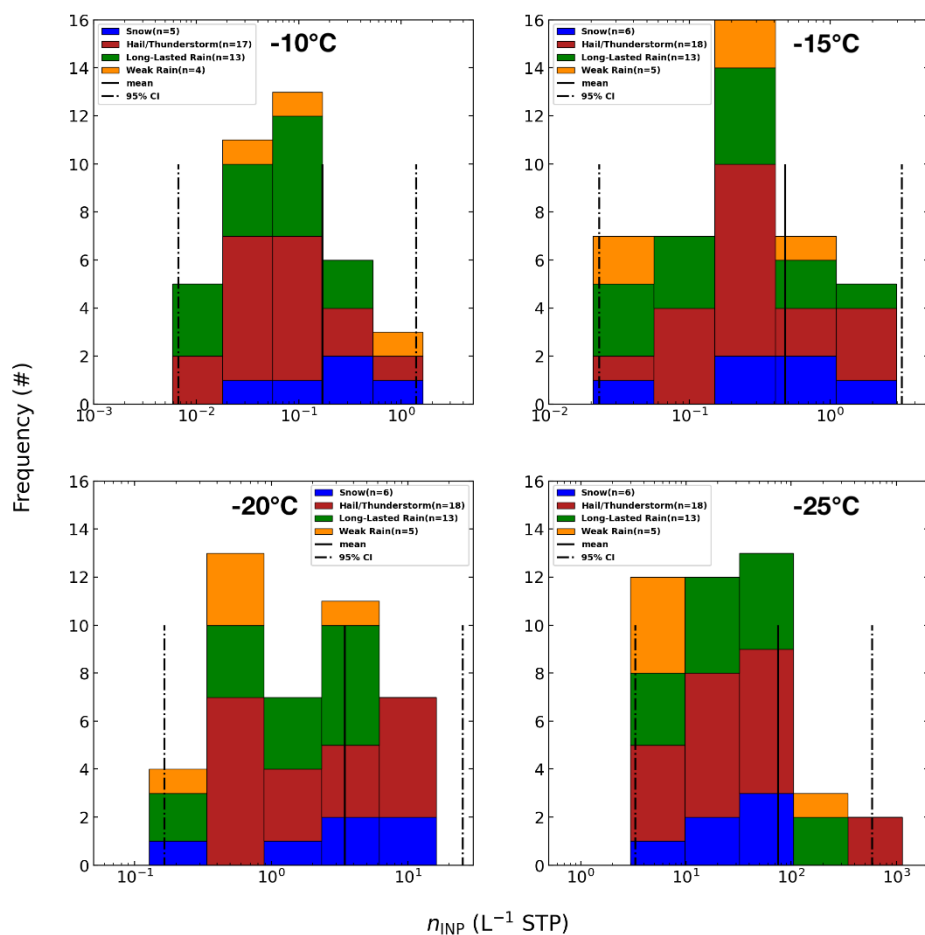

**Figure S5.** The  $n_{\text{INP}}(T)$  distribution over different  $T$ s. The histogram frequency is color-categorized for different types of precipitation, including snow, hail/thunderstorm rain, long-lasting rain, and weak rain, observed at the ground level (see **Table S2**).



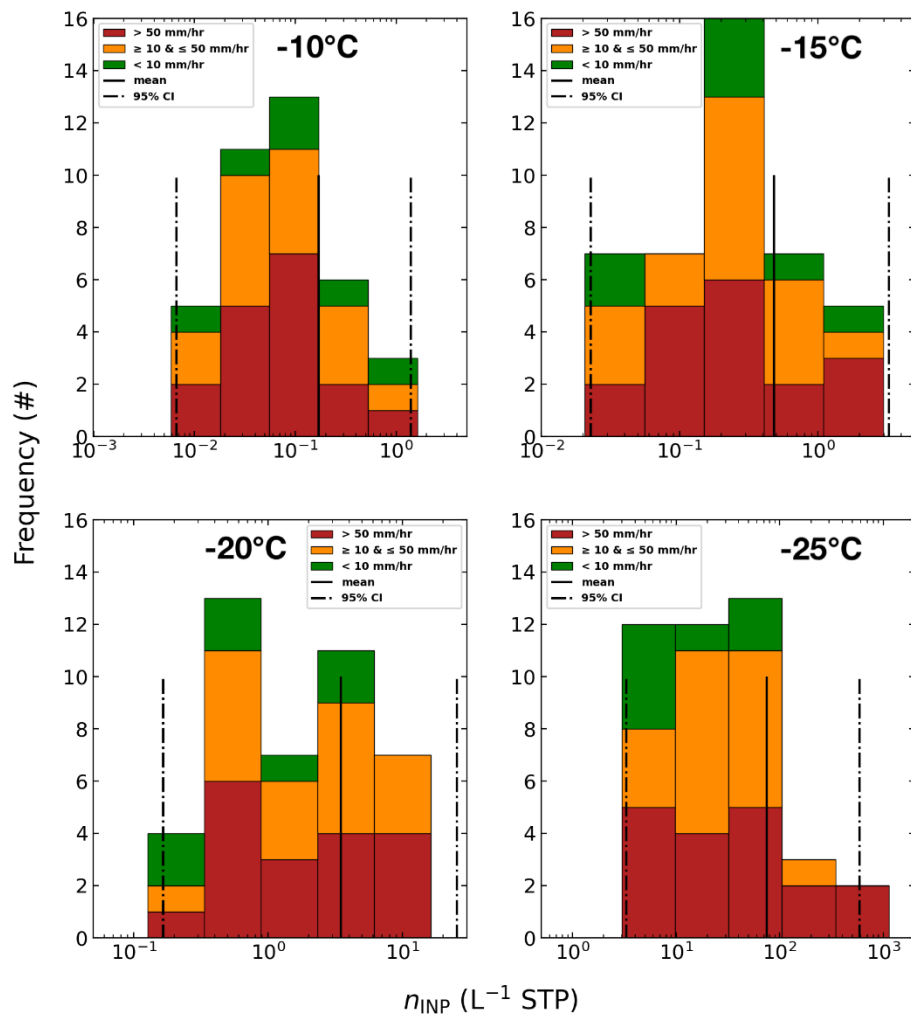

**Figure S6.** The  $n_{\text{INP}}(T)$  distribution histogram color-categorized based on three maximum precipitation intensity categories,  $< 10$  mm  $\text{hr}^{-1}$ ,  $10$ - $50$  mm  $\text{hr}^{-1}$ , and  $> 50$  mm  $\text{hr}^{-1}$  (see **Table S2**).

**Table S9.** Abundance of major bacterial orders in precipitation samples. Numbers indicate percentage of the OTUs/ASVs for each order in the total bacterial microbiome. ‘Bkgr’ represents the 24-hour dry deposition blank sample (Sample# 34). Our cattle feedyard samples were collected locally on March 28, 2019 (1), July 22, 2018 (2), July 23, 2018 (3), and July 24, 2018 (4) – see Hiranuma et al. (2020). PCPT 1-4 corresponds to our Sample# 1, 2, 50, and 7, respectively.

| Sample Type                                                                                          | PCPT<br>1 | PCPT<br>2 | PCPT<br>3 | PCPT<br>4 | Feedyard<br>2 | Feedyard<br>1 | Feedyard<br>3 | Feedyard<br>4 | 24-hour<br>dry-<br>depositio<br>n blank |
|------------------------------------------------------------------------------------------------------|-----------|-----------|-----------|-----------|---------------|---------------|---------------|---------------|-----------------------------------------|
| <b>Taxonomy</b>                                                                                      |           |           |           |           |               |               |               |               |                                         |
| Bacteria; Unclassified                                                                               | 2.6%      | 0.0%      | 0.0%      | 0.0%      | 0.5%          | 0.0%          | 1.3%          | 0.0%          | 2.8%                                    |
| Bacteria; Unclassified                                                                               | 0.0%      | 0.0%      | 0.8%      | 1.6%      | 0.0%          | 0.0%          | 0.0%          | 0.0%          | 0.0%                                    |
| Bacteria; Acidobacteria; Solibacteres; Solibacterales; Bryobacteraceae                               | 0.0%      | 0.0%      | 0.0%      | 0.0%      | 0.0%          | 0.0%          | 3.9%          | 0.0%          | 0.0%                                    |
| Bacteria; Actinobacteria; Actinobacteria; Actinomycetales                                            | 0.0%      | 0.0%      | 0.0%      | 0.0%      | 0.0%          | 2.4%          | 0.0%          | 0.0%          | 0.0%                                    |
| Bacteria; Actinobacteria; Actinobacteria; Actinomycetales; Actinosynnemataceae                       | 0.0%      | 0.0%      | 0.0%      | 0.0%      | 0.0%          | 0.0%          | 0.0%          | 0.0%          | 13.4%                                   |
| Bacteria; Actinobacteria; Actinobacteria; Actinomycetales; Geodermatophilaceae; Blastococcus         | 0.0%      | 0.0%      | 0.0%      | 0.0%      | 0.0%          | 0.0%          | 0.0%          | 0.0%          | 6.4%                                    |
| Bacteria; Actinobacteria; Actinobacteria; Actinomycetales; Microbacteriaceae; Labedella              | 0.0%      | 0.0%      | 0.0%      | 0.0%      | 0.0%          | 0.0%          | 0.0%          | 0.0%          | 5.0%                                    |
| Bacteria; Actinobacteria; Actinobacteria; Actinomycetales; Microbacteriaceae; Leifsonia              | 0.2%      | 0.0%      | 0.5%      | 0.0%      | 0.0%          | 0.0%          | 0.0%          | 0.0%          | 4.1%                                    |
| Bacteria; Actinobacteria; Actinobacteria; Actinomycetales; Micrococcaceae; Arthrobacter              | 0.0%      | 0.0%      | 0.0%      | 1.6%      | 0.0%          | 3.0%          | 0.0%          | 0.0%          | 0.0%                                    |
| Bacteria; Actinobacteria; Actinobacteria; Actinomycetales; Nocardiaceae                              | 0.0%      | 0.0%      | 0.0%      | 4.6%      | 0.0%          | 0.0%          | 0.0%          | 0.0%          | 0.0%                                    |
| Bacteria; Actinobacteria; Actinobacteria; Actinomycetales; Nocardiaceae; Rhodococcus                 | 0.0%      | 0.0%      | 0.0%      | 0.0%      | 2.1%          | 1.4%          | 0.0%          | 0.0%          | 0.0%                                    |
| Bacteria; Actinobacteria; Actinobacteria; Actinomycetales; Nocardioidaceae; Marmoricola              | 0.0%      | 0.0%      | 0.0%      | 0.0%      | 0.0%          | 0.0%          | 0.0%          | 0.0%          | 8.0%                                    |
| Bacteria; Actinobacteria; Actinobacteria; Actinomycetales; Nocardioidaceae; Nocardioides             | 0.0%      | 0.0%      | 0.0%      | 1.1%      | 3.5%          | 0.0%          | 0.1%          | 0.0%          | 0.0%                                    |
| Bacteria; Actinobacteria; Thermoleophila; Solirubrobacterales; Patulibacteraceae                     | 0.0%      | 1.5%      | 0.0%      | 1.0%      | 0.0%          | 0.0%          | 0.0%          | 0.0%          | 0.0%                                    |
| Bacteria; Actinobacteria; Thermoleophila; Solirubrobacterales; Patulibacteraceae; Patulibacter       | 0.6%      | 0.0%      | 0.0%      | 1.2%      | 0.0%          | 0.0%          | 0.0%          | 0.0%          | 0.0%                                    |
| Bacteria; Armatimonadetes                                                                            | 0.0%      | 0.0%      | 0.0%      | 3.2%      | 0.0%          | 0.0%          | 0.0%          | 0.0%          | 0.0%                                    |
| Bacteria; Armatimonadetes; Armatimonadia; Armatimonadales; Armatimonadaceae                          | 0.0%      | 6.5%      | 0.0%      | 3.9%      | 0.0%          | 0.0%          | 0.0%          | 6.0%          | 0.0%                                    |
| Bacteria; Armatimonadetes; Armatimonadia; Armatimonadales; Armatimonadaceae                          | 0.9%      | 0.0%      | 0.0%      | 0.0%      | 0.0%          | 0.0%          | 0.0%          | 0.0%          | 0.0%                                    |
| Bacteria; Armatimonadetes; Fimbrionadia; Fimbrionadales; Fimbrionadaceae; Fimbrionas                 | 0.0%      | 0.0%      | 0.0%      | 0.9%      | 0.0%          | 0.0%          | 0.0%          | 0.0%          | 0.0%                                    |
| Bacteria; Bacteroidetes                                                                              | 0.0%      | 0.0%      | 0.0%      | 3.2%      | 1.0%          | 0.0%          | 13.7%         | 0.0%          | 0.0%                                    |
| Bacteria; Bacteroidetes; Bacteroidia; Bacteroidales                                                  | 0.0%      | 0.0%      | 0.0%      | 0.0%      | 0.0%          | 0.0%          | 2.1%          | 9.5%          | 0.0%                                    |
| Bacteria; Bacteroidetes; Cytophagia; Cytophagales                                                    | 0.0%      | 0.8%      | 0.0%      | 5.6%      | 0.0%          | 0.0%          | 0.0%          | 4.0%          | 0.0%                                    |
| Bacteria; Bacteroidetes; Cytophagia; Cytophagales; Cyclobacteriaceae                                 | 0.0%      | 0.0%      | 0.0%      | 0.0%      | 0.0%          | 0.0%          | 0.7%          | 0.0%          | 0.0%                                    |
| Bacteria; Bacteroidetes; Cytophagia; Cytophagales; Cytophagaceae; Hymenobacter                       | 0.0%      | 0.5%      | 0.0%      | 0.0%      | 0.0%          | 0.0%          | 0.0%          | 0.0%          | 0.0%                                    |
| Bacteria; Bacteroidetes; Cytophagia; Cytophagales; Cytophagaceae; Rhodocytophaga                     | 0.0%      | 0.0%      | 0.0%      | 0.0%      | 0.0%          | 0.0%          | 0.0%          | 0.0%          | 4.2%                                    |
| Bacteria; Bacteroidetes; Cytophagia; Cytophagales; Cytophagaceae; Rudanella                          | 0.0%      | 1.4%      | 0.0%      | 0.0%      | 0.0%          | 0.0%          | 0.0%          | 0.0%          | 0.0%                                    |
| Bacteria; Bacteroidetes; Cytophagia; Cytophagales; Cytophagaceae; Spirosoma                          | 2.3%      | 6.8%      | 0.0%      | 3.8%      | 0.0%          | 0.0%          | 0.0%          | 0.0%          | 5.6%                                    |
| Bacteria; Bacteroidetes; Cytophagia; Cytophagales; Cytophagaceae; Sporocytophaga                     | 0.4%      | 0.0%      | 0.0%      | 0.0%      | 0.0%          | 0.0%          | 0.7%          | 0.0%          | 0.0%                                    |
| Bacteria; Bacteroidetes; Cytophagia; Cytophagales; Flammeovirgaceae                                  | 0.0%      | 0.0%      | 0.0%      | 0.0%      | 0.0%          | 2.0%          | 0.0%          | 0.0%          | 0.0%                                    |
| Bacteria; Bacteroidetes; Cytophagia; Cytophagales; Flammeovirgaceae; Marinoscillum                   | 8.7%      | 3.2%      | 17.3%     | 8.5%      | 8.4%          | 3.0%          | 6.2%          | 5.5%          | 0.0%                                    |
| Bacteria; Bacteroidetes; Flavobacteriia; Flavobacteriales; Flavobacteriaceae                         | 0.1%      | 0.0%      | 0.0%      | 0.0%      | 0.0%          | 0.0%          | 5.5%          | 0.0%          | 0.0%                                    |
| Bacteria; Bacteroidetes; Flavobacteriia; Flavobacteriales; Flavobacteriaceae; Flavobacterium         | 0.0%      | 0.0%      | 4.6%      | 0.0%      | 0.0%          | 0.0%          | 0.0%          | 0.0%          | 0.0%                                    |
| Bacteria; Bacteroidetes; Flavobacteriia; Flavobacteriales; Flavobacteriaceae; Persicivirga           | 0.0%      | 0.0%      | 0.0%      | 0.0%      | 6.8%          | 0.0%          | 2.1%          | 0.0%          | 0.0%                                    |
| Bacteria; Bacteroidetes; Flavobacteriia; Flavobacteriales; Weeksellaceae                             | 0.0%      | 0.0%      | 0.0%      | 0.0%      | 0.0%          | 2.2%          | 0.0%          | 0.0%          | 0.0%                                    |
| Bacteria; Bacteroidetes; Flavobacteriia; Flavobacteriales; Weeksellaceae; Elizabethkingia            | 0.0%      | 0.0%      | 0.0%      | 0.0%      | 0.0%          | 0.0%          | 4.1%          | 0.0%          | 0.0%                                    |
| Bacteria; Bacteroidetes; Sphingobacteriia; Sphingobacteriales; Sphingobacteriaceae; Mucilaginibacter | 0.0%      | 0.0%      | 5.8%      | 0.0%      | 0.0%          | 0.0%          | 3.6%          | 0.0%          | 0.0%                                    |
| Bacteria; Bacteroidetes; Sphingobacteriia; Sphingobacteriales; Sphingobacteriaceae; Pedobacter       | 3.2%      | 0.0%      | 1.8%      | 5.3%      | 1.0%          | 0.0%          | 6.6%          | 0.0%          | 0.0%                                    |
| Bacteria; Bacteroidetes; Saprospirae; Saprospirales; Chitinophagaceae                                | 0.0%      | 0.0%      | 0.0%      | 1.6%      | 0.0%          | 0.0%          | 1.1%          | 9.7%          | 1.1%                                    |
| Bacteria; Bacteroidetes; Saprospirae; Saprospirales; Chitinophagaceae; Ferruginibacter               | 0.0%      | 0.0%      | 0.0%      | 0.0%      | 5.3%          | 0.0%          | 0.0%          | 0.0%          | 0.0%                                    |

**Table S9.** Abundance of major bacterial orders in precipitation samples. Numbers indicate percentage of the OTUs/ASVs for each order in the total bacterial microbiome – continued.

| Sample Type                                                                                     | PCPT 1 | PCPT 2 | PCPT 3 | PCPT 4 | Feedyard<br>2 | Feedyard<br>1 | Feedyard<br>3 | Feedyard<br>4 | 24-hour<br>dry-<br>deposition<br>blank |
|-------------------------------------------------------------------------------------------------|--------|--------|--------|--------|---------------|---------------|---------------|---------------|----------------------------------------|
| Taxonomy                                                                                        |        |        |        |        |               |               |               |               |                                        |
| Bacteria; Bacteroidetes; Saprospirae; Saprospirales; Chitinophagaceae; Fillimonas               | 0.0%   | 0.0%   | 0.0%   | 0.0%   | 0.0%          | 0.0%          | 2.5%          | 0.0%          | 0.0%                                   |
| Bacteria; Bacteroidetes; Saprospirae; Saprospirales; Chitinophagaceae; Parasegitibacter         | 0.0%   | 0.0%   | 0.0%   | 0.0%   | 0.0%          | 0.0%          | 1.8%          | 0.0%          | 0.0%                                   |
| Bacteria; Bacteroidetes; Saprospirae; Saprospirales; Chitinophagaceae; Trachelomonas            | 3.9%   | 0.0%   | 0.0%   | 9.5%   | 0.0%          | 0.0%          | 0.0%          | 0.0%          | 8.2%                                   |
| Bacteria; Chlorobi                                                                              | 2.3%   | 0.0%   | 0.0%   | 0.0%   | 0.0%          | 0.0%          | 0.0%          | 0.0%          | 0.0%                                   |
| Bacteria; Cyanobacteria                                                                         | 0.0%   | 0.0%   | 0.0%   | 0.0%   | 0.0%          | 0.0%          | 0.0%          | 0.0%          | 0.6%                                   |
| Bacteria; FBP                                                                                   | 0.0%   | 0.0%   | 0.0%   | 1.7%   | 0.0%          | 0.0%          | 0.0%          | 0.0%          | 0.0%                                   |
| Bacteria; Firmicutes; Bacilli; Bacillales                                                       | 0.0%   | 0.0%   | 0.0%   | 0.0%   | 0.0%          | 0.0%          | 4.0%          | 0.0%          | 0.0%                                   |
| Bacteria; Firmicutes; Bacilli; Bacillales; Bacillaceae                                          | 0.0%   | 0.0%   | 0.0%   | 0.0%   | 0.0%          | 2.1%          | 1.1%          | 0.0%          | 0.0%                                   |
| Bacteria; Firmicutes; Bacilli; Bacillales; Bacillaceae; Bacillus                                | 0.0%   | 0.0%   | 0.0%   | 0.0%   | 0.0%          | 0.0%          | 4.8%          | 0.0%          | 0.0%                                   |
| Bacteria; Firmicutes; Bacilli; Bacillales; Planococcaceae                                       | 0.0%   | 0.0%   | 0.0%   | 0.0%   | 0.2%          | 0.0%          | 0.2%          | 0.0%          | 0.0%                                   |
| Bacteria; Firmicutes; Bacilli; Lactobacillales; Aerococcaceae; Lacticigenium                    | 0.0%   | 0.0%   | 0.0%   | 0.0%   | 0.0%          | 0.0%          | 0.8%          | 0.0%          | 0.0%                                   |
| Bacteria; Firmicutes; Clostridia; Clostridiales; Clostridiaceae; Clostridium                    | 0.0%   | 0.0%   | 0.0%   | 0.0%   | 0.0%          | 1.4%          | 0.7%          | 0.0%          | 0.0%                                   |
| Bacteria; Gemmatimonadetes; Gemm-3                                                              | 0.0%   | 0.0%   | 0.0%   | 0.0%   | 0.0%          | 0.0%          | 0.4%          | 0.0%          | 0.0%                                   |
| Bacteria; Gemmatimonadetes; Gemmatimonadetes; Gemmatimonadales                                  | 0.0%   | 0.0%   | 0.0%   | 0.0%   | 0.0%          | 0.0%          | 0.0%          | 0.0%          | 1.8%                                   |
| Bacteria; Gemmatimonadetes; Gemmatimonadetes; Gemmatimonadales; Elin5301                        | 0.0%   | 0.0%   | 0.0%   | 2.0%   | 0.0%          | 0.0%          | 0.0%          | 0.0%          | 0.0%                                   |
| Bacteria; Gemmatimonadetes; Gemmatimonadetes; Gemmatimonadales; Gemmatimonadaceae; Gemmatimonas | 0.0%   | 0.0%   | 0.0%   | 0.0%   | 0.0%          | 0.0%          | 0.1%          | 0.0%          | 0.0%                                   |
| Bacteria; Planctomycetes; Phycisphaerae                                                         | 3.8%   | 0.0%   | 0.0%   | 0.0%   | 0.0%          | 0.0%          | 0.0%          | 0.0%          | 0.0%                                   |
| Bacteria; Planctomycetes; Planctomycetia; Gemmatales; Isosphaeraceae                            | 0.0%   | 0.2%   | 0.0%   | 0.0%   | 0.0%          | 0.0%          | 0.0%          | 0.0%          | 0.0%                                   |
| Bacteria; Planctomycetes; Planctomycetia; Gemmatales; Isosphaeraceae; Nostocoida                | 0.0%   | 0.0%   | 0.0%   | 0.0%   | 0.0%          | 0.0%          | 0.0%          | 0.0%          | 2.8%                                   |
| Bacteria; Proteobacteria                                                                        | 8.3%   | 8.7%   | 0.0%   | 0.0%   | 0.0%          | 0.0%          | 0.0%          | 0.0%          | 0.0%                                   |
| Bacteria; Proteobacteria; Alphaproteobacteria                                                   | 0.0%   | 0.0%   | 0.0%   | 0.0%   | 1.5%          | 0.0%          | 3.1%          | 17.7%         | 0.0%                                   |
| Bacteria; Proteobacteria; Alphaproteobacteria; Caulobacterales; Caulobacteraceae                | 0.0%   | 0.0%   | 0.0%   | 0.0%   | 0.0%          | 0.0%          | 0.0%          | 0.0%          | 4.6%                                   |
| Bacteria; Proteobacteria; Alphaproteobacteria; Caulobacterales; Caulobacteraceae; Arthrosira    | 0.0%   | 0.0%   | 0.0%   | 0.0%   | 0.0%          | 0.0%          | 2.4%          | 0.0%          | 0.0%                                   |
| Bacteria; Proteobacteria; Alphaproteobacteria; Caulobacterales; Caulobacteraceae; Brevundimonas | 6.2%   | 15.0%  | 0.0%   | 0.0%   | 1.2%          | 0.0%          | 4.5%          | 19.7%         | 2.8%                                   |
| Bacteria; Proteobacteria; Alphaproteobacteria; Caulobacterales; Caulobacteraceae; Caulobacter   | 2.5%   | 2.3%   | 0.0%   | 0.0%   | 0.0%          | 0.0%          | 0.0%          | 0.0%          | 0.0%                                   |
| Bacteria; Proteobacteria; Alphaproteobacteria; Rhizobiales                                      | 2.8%   | 0.0%   | 0.0%   | 5.3%   | 0.0%          | 0.0%          | 0.0%          | 0.0%          | 0.0%                                   |
| Bacteria; Proteobacteria; Alphaproteobacteria; Rhizobiales; Aurantimonadaceae; Aurantimonas     | 0.0%   | 0.8%   | 0.0%   | 1.0%   | 0.0%          | 0.0%          | 0.0%          | 0.0%          | 0.0%                                   |
| Bacteria; Proteobacteria; Alphaproteobacteria; Rhizobiales; Beijerinckiaceae                    | 0.0%   | 0.0%   | 0.0%   | 3.5%   | 0.0%          | 0.0%          | 0.0%          | 0.0%          | 0.0%                                   |
| Bacteria; Proteobacteria; Alphaproteobacteria; Rhizobiales; Bradyrhizobiaceae                   | 1.8%   | 2.4%   | 0.0%   | 3.5%   | 0.0%          | 0.0%          | 0.0%          | 0.0%          | 0.3%                                   |
| Bacteria; Proteobacteria; Alphaproteobacteria; Rhizobiales; Phyllobacteriaceae                  | 0.0%   | 1.2%   | 0.0%   | 0.0%   | 0.0%          | 0.0%          | 0.0%          | 0.0%          | 0.0%                                   |
| Bacteria; Proteobacteria; Alphaproteobacteria; Rhizobiales; Rhizobiaceae; Rhizobium             | 3.4%   | 0.0%   | 0.0%   | 0.0%   | 0.0%          | 0.0%          | 0.0%          | 0.0%          | 0.0%                                   |
| Bacteria; Proteobacteria; Alphaproteobacteria; Rhizobiales; Xanthobacteraceae                   | 0.0%   | 1.6%   | 0.0%   | 1.6%   | 0.0%          | 0.0%          | 0.0%          | 0.0%          | 0.0%                                   |
| Bacteria; Proteobacteria; Alphaproteobacteria; Rhizobiales; Xanthobacteraceae; Ancylobacter     | 0.0%   | 0.0%   | 1.2%   | 0.0%   | 0.0%          | 0.0%          | 0.0%          | 0.0%          | 0.0%                                   |
| Bacteria; Proteobacteria; Alphaproteobacteria; Rhodobacterales; Rhodobacteraceae                | 0.2%   | 0.0%   | 0.0%   | 0.0%   | 0.0%          | 0.0%          | 0.0%          | 0.0%          | 0.0%                                   |
| Bacteria; Proteobacteria; Alphaproteobacteria; Rhodospirillales; Acetobacteraceae               | 1.8%   | 0.5%   | 0.0%   | 0.0%   | 0.0%          | 0.0%          | 0.0%          | 0.0%          | 1.9%                                   |
| Bacteria; Proteobacteria; Alphaproteobacteria; Rhodospirillales; Acetobacteraceae; Roseomonas   | 0.0%   | 0.0%   | 0.0%   | 0.8%   | 0.0%          | 0.0%          | 0.1%          | 0.0%          | 0.0%                                   |
| Bacteria; Proteobacteria; Alphaproteobacteria; Sphingomonadales                                 | 3.5%   | 5.7%   | 0.0%   | 0.0%   | 0.0%          | 0.0%          | 0.0%          | 0.0%          | 0.0%                                   |

**Table S9.** Abundance of major bacterial orders in precipitation samples. Numbers indicate percentage of the OTUs/ASVs for each order in the total bacterial microbiome – continued.

| Sample Type                                                                                         | PCPT 1 | PCPT 2 | PCPT 3 | PCPT 4 | Feedyard<br>2 | Feedyard<br>1 | Feedyard<br>3 | Feedyard<br>4 | 24-hour<br>dry-<br>depositi<br>n blank |
|-----------------------------------------------------------------------------------------------------|--------|--------|--------|--------|---------------|---------------|---------------|---------------|----------------------------------------|
| Taxonomy                                                                                            |        |        |        |        |               |               |               |               |                                        |
| Bacteria; Proteobacteria; Alphaproteobacteria; Sphingomonadales; Erythrobacteraceae                 | 0.0%   | 0.0%   | 0.0%   | 0.0%   | 0.0%          | 0.0%          | 0.0%          | 0.0%          | 7.7%                                   |
| Bacteria; Proteobacteria; Alphaproteobacteria; Sphingomonadales; Erythrobacteraceae; Porphyrobacter | 0.0%   | 0.0%   | 0.0%   | 0.0%   | 0.5%          | 0.0%          | 0.0%          | 0.0%          | 0.0%                                   |
| Bacteria; Proteobacteria; Alphaproteobacteria; Sphingomonadales; Sphingomonadaceae                  | 0.0%   | 4.7%   | 0.0%   | 0.0%   | 0.0%          | 0.0%          | 0.0%          | 0.0%          | 4.5%                                   |
| Bacteria; Proteobacteria; Alphaproteobacteria; Sphingomonadales; Sphingomonadaceae; Novosphingobium | 4.2%   | 0.0%   | 5.1%   | 0.0%   | 0.0%          | 0.0%          | 0.5%          | 8.3%          | 0.0%                                   |
| Bacteria; Proteobacteria; Alphaproteobacteria; Sphingomonadales; Sphingomonadaceae; Sphingomonas    | 0.7%   | 14.1%  | 7.4%   | 0.7%   | 0.0%          | 1.4%          | 0.0%          | 0.0%          | 2.1%                                   |
| Bacteria; Proteobacteria; Betaproteobacteria; Burkholderiales; Comamonadaceae                       | 8.8%   | 0.0%   | 5.9%   | 4.3%   | 0.0%          | 0.0%          | 0.3%          | 0.0%          | 5.9%                                   |
| Bacteria; Proteobacteria; Betaproteobacteria; Burkholderiales; Comamonadaceae; Acidovorax           | 0.0%   | 0.0%   | 3.9%   | 0.0%   | 0.0%          | 0.0%          | 1.0%          | 0.0%          | 0.0%                                   |
| Bacteria; Proteobacteria; Betaproteobacteria; Burkholderiales; Comamonadaceae; Pseudorhodoferax     | 0.0%   | 3.7%   | 0.0%   | 0.0%   | 7.4%          | 0.0%          | 0.0%          | 0.0%          | 0.0%                                   |
| Bacteria; Proteobacteria; Betaproteobacteria; Burkholderiales; Oxalobacteraceae                     | 4.1%   | 6.1%   | 19.4%  | 0.0%   | 6.7%          | 14.6%         | 0.0%          | 5.2%          | 0.0%                                   |
| Bacteria; Proteobacteria; Betaproteobacteria; Burkholderiales; Oxalobacteraceae; Herminiimonas      | 0.0%   | 0.0%   | 0.0%   | 0.0%   | 0.0%          | 0.0%          | 2.4%          | 0.0%          | 0.0%                                   |
| Bacteria; Proteobacteria; Betaproteobacteria; Burkholderiales; Oxalobacteraceae; Massilia           | 13.9%  | 10.6%  | 8.4%   | 11.3%  | 53.9%         | 65.4%         | 6.5%          | 10.6%         | 0.9%                                   |
| Bacteria; Proteobacteria; Betaproteobacteria; Burkholderiales; Oxalobacteraceae; Naxibacter         | 0.0%   | 0.0%   | 0.0%   | 0.0%   | 0.0%          | 0.0%          | 1.6%          | 0.0%          | 0.0%                                   |
| Bacteria; Proteobacteria; Deltaproteobacteria; Myxococcales                                         | 0.0%   | 0.0%   | 0.0%   | 2.3%   | 0.0%          | 0.0%          | 0.0%          | 0.0%          | 0.0%                                   |
| Bacteria; Proteobacteria; Deltaproteobacteria; Myxococcales; OM27                                   | 5.4%   | 0.0%   | 0.0%   | 0.0%   | 0.0%          | 0.0%          | 0.0%          | 0.0%          | 0.0%                                   |
| Bacteria; Proteobacteria; Deltaproteobacteria; Myxococcales; Polyangiaceae                          | 0.0%   | 0.0%   | 0.0%   | 0.0%   | 0.0%          | 0.0%          | 0.2%          | 0.0%          | 0.0%                                   |
| Bacteria; Proteobacteria; Gammaproteobacteria; Alteromonadales; Alteromonadaceae; Gilvimirinus      | 0.0%   | 0.0%   | 11.0%  | 0.0%   | 0.0%          | 0.0%          | 0.0%          | 0.0%          | 0.0%                                   |
| Bacteria; Proteobacteria; Gammaproteobacteria; Alteromonadales; OM60; Haliea                        | 0.0%   | 0.0%   | 0.0%   | 0.0%   | 0.0%          | 0.0%          | 0.5%          | 0.0%          | 0.0%                                   |
| Bacteria; Proteobacteria; Gammaproteobacteria; Enterobacteriales; Enterobacteriaceae; Pseudomonas   | 0.0%   | 0.0%   | 6.9%   | 0.0%   | 0.0%          | 0.0%          | 0.0%          | 0.0%          | 0.0%                                   |
| Bacteria; Proteobacteria; Gammaproteobacteria; Legionellales                                        | 1.9%   | 0.0%   | 0.0%   | 0.0%   | 0.0%          | 0.0%          | 0.0%          | 0.0%          | 0.0%                                   |
| Bacteria; Proteobacteria; Gammaproteobacteria; Pseudomonadales; Moraxellaceae; Acinetobacter        | 0.0%   | 0.0%   | 0.0%   | 0.0%   | 0.0%          | 1.1%          | 0.4%          | 0.0%          | 0.0%                                   |
| Bacteria; Proteobacteria; Gammaproteobacteria; Pseudomonadales; Pseudomonadaceae; Pseudomonas       | 0.0%   | 0.0%   | 0.0%   | 0.0%   | 0.0%          | 0.0%          | 0.4%          | 0.0%          | 0.0%                                   |
| Bacteria; Proteobacteria; Gammaproteobacteria; Xanthomonadales; Xanthomonadaceae; Achromobacter     | 0.0%   | 0.0%   | 0.0%   | 0.0%   | 0.0%          | 0.0%          | 0.0%          | 0.0%          | 0.2%                                   |
| Bacteria; Proteobacteria; Gammaproteobacteria; Xanthomonadales; Xanthomonadaceae; Lysobacter        | 0.0%   | 1.8%   | 0.0%   | 0.6%   | 0.0%          | 0.0%          | 0.0%          | 3.8%          | 0.0%                                   |
| Bacteria; Thermi; Deinococci; Deinococcales; Deinococcaceae; Deinococcus                            | 0.0%   | 0.0%   | 0.0%   | 0.0%   | 0.0%          | 0.0%          | 0.0%          | 0.0%          | 5.0%                                   |
| Bacteria; Verrucomicrobia; Opitutae; Opitutales; Opitutaceae; Opitutus                              | 0.0%   | 0.0%   | 0.0%   | 0.9%   | 0.0%          | 0.0%          | 3.7%          | 0.0%          | 0.0%                                   |
| Bacteria; Verrucomicrobia; Pedosphaerae; Pedosphaerales; Pedosphaeraceae                            | 0.0%   | 0.0%   | 0.0%   | 0.0%   | 0.0%          | 0.0%          | 2.5%          | 0.0%          | 0.0%                                   |
| Bacteria; Verrucomicrobia; Spartobacteria; Chthoniobacteriales; Chthoniobacteraceae                 | 0.0%   | 0.0%   | 0.0%   | 0.0%   | 0.0%          | 0.0%          | 1.9%          | 0.0%          | 0.0%                                   |
| Bacteria; Verrucomicrobia; Spartobacteria; Chthoniobacteriales; Chthoniobacteraceae; Chthoniobacter | 1.7%   | 0.0%   | 0.0%   | 3.8%   | 0.0%          | 0.0%          | 0.0%          | 0.0%          | 0.0%                                   |

## Data Availability

Original data created for the study are or will be available in a persistent repository (pangaea.de) upon publication.

## SI References

Delle Monache, L., Perry, K. D., Cederwall, R. T., and Ogren, J. A.: In situ aerosol profiles over the Southern Great Plains cloud and radiation test bed site: 2. Effects of mixing height on aerosol properties, *J. Geophys. Res.*, 109, D06209, 2004.

Dong, X., Minnis, P., Xi, B., Sun-Mack, S., and Chen, Y.: Comparison of CERES-MODIS stratus cloud properties with ground-based measurements at the DOE ARM Southern Great Plains site, *J. Geophys. Res.*, 113, D03204, 2008.

Ervens, B., and Feingold, G.: Sensitivities of immersion freezing: Reconciling classical nucleation theory and deterministic expressions, *Geophysical Research Letters*, 40, 3320-3324, 2013.

Hiranuma, N., Auvermann, B. W., Belosi, F., Bush, J., Cory, K. M., Fösig, R., Georgakopoulos, D., Höhler, K., Hou, Y., Saathoff, H., Santachiara, G., Shen, X., Steinke, I., Umo, N., Vepuri, H. S. K., Vogel, F., and Möhler, O.: Feedlot is a unique and constant source of atmospheric ice-nucleating particles, *Atmos. Chem. Phys. Discuss.*, <https://doi.org/10.5194/acp-2020-1042>, in review, 2020.

Murray, B. J., O'sullivan, D., Atkinson, J. D., and Webb, M. E.: Ice nucleation by particles immersed in supercooled cloud droplets, *Chem. Soc. Rev.*, 41, 6519-6554, 2012.

Niedermeier, D., Shaw, R. A., Hartmann, S., Wex, H., Clauss, T., Voigtländer, J., and Stratmann, F.: Heterogeneous ice nucleation: exploring the transition from stochastic to singular freezing behavior, *Atmos. Chem. Phys.*, 11, 8767-8775, 2011.

Pruppacher, H. R., and Klett, J. D.: Mechanics of the atmospheric aerosol. In *Microphysics of Clouds and Precipitation – Second Revised and Enlarged Edition*, pp. 447-484, Springer, 2010.

Schmid, P., and Niyogi, D.: A method for estimating planetary boundary layer heights and its application over the ARM Southern Great Plains site, *Journal of Atmospheric and Oceanic Technology*, 29, 316-322, 2012.

Seinfeld, J. H. and Pandis, S. N.: *Atmospheric Chemistry and Physics: From Air Pollution to Climate Change*, pp. 997-1074, Wiley, 1996.

Wang, X., Zhang, L., and Moran, M. D.: Development of a new semi-empirical parameterization for below-cloud scavenging of size-resolved aerosol particles by both rain and snow, *Geosci. Model Dev.*, 7, 799-819, 2014.

330 Zhu, P., Albrecht, B., and Gottschalck, J.: Formation and development of nocturnal boundary layer clouds over the southern Great Plains, *Journal of the Atmospheric Sciences*, 58, 1409-1426, 2001.
