# Supplementary material for: Ice-nucleating particles in precipitation samples from the Texas Panhandle
Source: Copernicus journal article supplement (doi:10.5194/acp-21-4503-2021), 2021-03-24
Supplement: Supplementary file [file acp-21-4503-2021-supplement-title-page.pdf › acp-21-4503-2021-supplement-title-page.pdf]

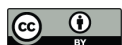

## *Supplement of*

# **Ice-nucleating particles in precipitation samples from the Texas Panhandle**

**Hemanth S. K. Vepuri et al.**

*Correspondence to:* Naruki Hiranuma (nhiranuma@wtamu.edu)

- acp-21-4503-2021-supplement-title-page.pdf
- INPs\_in\_precipitation\_samples\_from\_the\_Texas\_Panhandle
  - 2018-2019\_PCPT
    - \* 2018-2019\_PCPT\_README.txt
    - \* Individual
    - \* Merged
  - Figure\_Data
    - \* Disdrometer\_size\_distribution\_hail\_data.csv
    - \* Disdrometer\_size\_distribution\_long-lasting\_rain\_data.csv
    - \* Disdrometer\_size\_distribution\_snow\_data.csv
    - \* Disdrometer\_size\_distribution\_weak\_rain\_data.csv
    - \* Metagenomics\_data.csv
    - \* Time\_series\_of\_cumulative\_nINP\_PCPT\_paper\_Data.csv
    - \* Time\_series\_of\_disdrometer\_and\_IoT\_sensor\_measurements.csv
    - \* WT\_CRAFT\_cooling\_rate\_variation\_test\_data.csv
    - \* WT\_CRAFT\_time\_trial\_test\_data.csv
    - \* nINP\_T\_spectrum\_Dry\_Deposition\_data.csv
    - \* nINP\_T\_spectrum\_Vali\_1968\_Lower\_Limit.csv
    - \* nINP\_T\_spectrum\_Vali\_1968\_Upper\_Limit.csv
    - \* nINP\_T\_spectrum\_hail\_data.csv
    - \* nINP\_T\_spectrum\_long-lasting\_rain\_data.csv
    - \* nINP\_T\_spectrum\_weak\_rain\_data.csv
- supplement.pdf

The copyright of individual parts of the supplement might differ from the article licence.
